# Supplementary material
Source: PubMed Central journal article supplement (PMC5055379)
Supplement: NIHMS817387-supplement-Supporting_Info.pdf [file NIHMS817387-supplement-Supporting_Info.pdf]

# Direct Investigation of Slow Correlated Dynamics in Proteins via Dipolar Interactions

R. Bryn Fenwick<sup>1,2\*</sup>, Charles D. Schwieters<sup>3</sup>, Beat Vögeli<sup>4\*</sup>

<sup>1</sup>Institute for Research in Biomedicine (IRB Barcelona), Parc Científic de Barcelona, C/ Baldori Reixac 10,  
08028 Barcelona, Spain

<sup>2</sup>The Scripps Research Institute (TSRI), 10550 North Torrey Pines Road, La Jolla, CA 92037, USA

<sup>3</sup>Division of Computational Bioscience, Building 12A Center for Information Technology, National  
Institutes of Health, Bethesda, MD 20892-5624, USA

<sup>4</sup>Laboratory of Physical Chemistry, Vladimir-Prelog-Weg 2, Swiss Federal Institute of  
Technology, ETH-Hönggerberg, CH-8093 Zürich, Switzerland

## NMR spectroscopy

$\Gamma_{\text{HNiNi}/\text{HNi+1Ni+1}} + \Gamma_{\text{HNiNi+1}/\text{HNi+1Ni}}$  **measurements.** 'reference' and 'trans' spectra of 3D ct- $^{13}\text{C}'$ -HN(CA)CON [ct- $^{13}\text{C}^\alpha$ -HNCA(CO)N] experiments (derived from a 2D version presented in reference 1<sup>1</sup>) were recorded with  $36(\text{N}, t_1) \times 40(\text{C}', t_2)[20(\text{C}^\alpha, t_2)] \times 512(\text{H}^{\text{N}}, t_3)$  complex points,  $t_{1\text{max}} = 18.0$  ms,  $t_{2\text{max}} = 26.4[6.6]$  ms,  $t_{3\text{max}} = 51.2$  ms, an interscan delay of 1.0 s,  $\tau_{\text{MQ}} = 43$  ms, and typically 16[32] scans per increment resulting in a measurement time of  $1[2]^2$  day. Because the 'trans' spectra are considerably less sensitive they were typically recorded twice and added up thereby effectively doubling the number of scans. The time domain data were multiplied with a square cosine function in the direct dimension and cosine functions in the indirect dimensions and zero-filled to  $256 \times 128 \times 2048$  complex points. Spectra with  $^{13}\text{C}'$  and with  $^{13}\text{C}^\alpha$  evolution were recorded twice and three times, respectively, such that averaged CCR rates with associated random errors could be obtained.

$\Gamma_{\text{d(HAiCAi)/d(HAi-1CAi-1)}} + \Gamma_{\text{d(HAiCAi-1)/d(HAi-1CAi)}}$  **measurements.** 'reference' and 'trans' spectra of the 2D HNCA(CA) experiment put forward in Charpin et al.<sup>3</sup> and a 3D  $^{13}\text{C}^\alpha$ -HNCA(CO)CA experiment were recorded with  $64(\text{N}, t_1) \times 512(\text{H}^{\text{N}}, t_2)$  and  $36(\text{N}, t_1) \times 24(\text{C}^\alpha, t_2) \times 512(\text{H}^{\text{N}}, t_3)$  complex points,  $t_{1\text{max}} = 32.0$  ms,  $t_{2\text{max}} = 51.2$  ms and  $t_{1\text{max}} = 18.0$  ms,  $t_{2\text{max}} = 7.92$  ms,  $t_{3\text{max}} = 51.2$  ms, an interscan delay of 1.0 s,  $\tau_{\text{MQ}} = 28$  ms, and typically 256 and 32 per increment resulting in a measurement time of 0.5 and 2 days, respectively. Because the 'trans' spectra are considerably less sensitive than the 'reference' spectra they were typically recorded twice and added up thereby effectively doubling the number of scans. The time domain data were multiplied with a square cosine function in the direct dimension and cosine functions in the indirect dimensions and zero-filled to  $1024 \times 4096$  and  $256 \times 128 \times 2048$  complex points. All spectra were recorded twice so that average CCR rates and associated random errors could be obtained.

$\Gamma_{\text{HNiNi}/\text{HAIcAI}} + \Gamma_{\text{HAIiNi}/\text{HNiCAi}}$  **measurements.** The two experiments used previously to determine the intraresidual  $\Gamma_{\text{d(HN)/d(H}\alpha\text{C}\alpha)} + \Gamma_{\text{d(H}\alpha\text{N)/d(HC}\alpha)}$  CCR rate were repeated.<sup>4</sup> The first approach relies on the ACE method realized in a 3D ct-HNCA experiment.<sup>4</sup>

In the second approach, the DIAI method is realized with a pair of 3D HNCA pulse sequences ('reference' and 'trans') was used as presented in Pelupessy et al. in 2 days.<sup>5</sup>

In addition, a 3D ct-HNCA MMQ experiment was used. As proposed in Yang and Kay,<sup>6</sup> the ZQ and DQ coherences are superimposed resulting in 4 components to be evaluated. The spectrum was recorded twice with  $\tau_{\text{MQ}} = 31.0$  ms or  $\tau_{\text{MQ}} = 33.5$  ms,  $50(\text{MQ}[\text{N}, \text{C}^\alpha], t_1)$  or  $55(\text{MQ}[\text{N}, \text{C}^\alpha], t_1) \times 36(\text{N}, t_2) \times 512(\text{H}^{\text{N}}, t_3)$  complex points,  $t_{1\text{max}} = 25.0$  ms or  $t_{1\text{max}} = 27.5$  ms,  $t_{2\text{max}} = 18.0$  ms,  $t_{3\text{max}} = 63.28$  ms, an interscan delay of 1 s or 0.92 s and 16 or 24 scans per increment resulting in a measurement time of 1.5 or 2 days. The time domain data were multiplied with a square cosine function in the direct dimension and cosine functions in the indirect dimensions and zero-filled to  $256 \times 128 \times 2048$  complex points.

$\Gamma_{\text{HNiNi}/\text{HAI-1CAi-1}} + \Gamma_{\text{HAI-1Ni}/\text{HNi-1CAi-1}}$  **measurements.** Three experiments used previously were repeated.<sup>4</sup> The first approach relies on ACE realized in a 3D ct-HN(CO)CA experiment. In the second and third approach, the DIAI method is realized with two types of 2D HN(CO)CA experiments.<sup>7,8</sup> In the third approach, the standard formula to extract the CCR rate is modified to account for the three following effects: First, the temporary interconversion of the ZQ and DQ coherences reverses the relevant CCR. Thus, the effective time during which the relevant CCR occurs is actually  $\tau_{\text{MQ, effective}} = \tau_{\text{MQ}} - 1/(2J_{\text{HN}}) + 1/(2J_{\text{HC}})$ . Second, for the same reason, the ratio of the intensities is modified by a term proportional to  $(1/(2J_{\text{HN}}) - 1/(2J_{\text{HC}}))$  and the CCR rate itself, see equation 2b in Pelupessy et al.<sup>8</sup> Here, the CCR rates obtained from the DIAI 2D experiment mentioned above are used as an estimate for this correction term. Third, the  $\text{MQ}[\text{}^{15}\text{N}_i, \text{}^{13}\text{C}^\alpha_{i-1}]$  coherences scalar couple to  $\text{}^{15}\text{N}_{i-1}$  and  $\text{}^{13}\text{C}^\alpha_i$  via  $J_{\text{Ni-1C}\alpha i-1}$  and  $J_{\text{NiC}\alpha i}$ . Because the inversion pulses

on the MQ coherences are non-uniformly shifted in the 'trans' experiment, the intensities of the 'ref' and 'trans' spectra are affected in different ways. Here, it is assumed that both couplings have uniform values of 9 Hz. This results in rescaling of the 'ref' and 'trans' intensities of 1/0.49 and 1/0.55, respectively.

All spectra were processed and analyzed using the software packages NMRPipe.<sup>9</sup> Peak heights were determined by parabolic interpolation. Peak positions were determined in the reference spectrum with typically much higher peak intensity and fitted at the according position in the transfer spectra.

**Corrections from full relaxation-matrix analysis.** Corrections to the apparent CCR rates were calculated as outlined in Vogeli and Yao.<sup>4</sup> The most important coefficients in the relaxation matrix were looked up or estimated individually for each CCR rate. For the  $H^N$ -N/ $H^N$ -N CCR rates, the dipolar cross-relaxation rates  $W_0$  were taken from Vogeli et al. if available and calculated otherwise.<sup>10</sup> For the  $H^\alpha$ - $C^\alpha$ / $H^\alpha$ - $C^\alpha$  CCR rates, all cases yield errors in the per-mil range and no detailed analysis was carried out.<sup>11</sup> For the intraresidual and sequential  $H^N$ -N/ $H^\alpha$ - $C^\alpha$  CCR rates,  $W_0$  rates and proton autorelaxation rates were taken from Vogeli et al. if available.<sup>10</sup> Otherwise, the  $W_0$  rates were estimated from the distances and averages were used for the autorelaxation rates.

**Experimental errors of the CCR rates.** The standard deviations of the averages are 0.19, 1.37, 0.20 and 0.26  $s^{-1}$  for the  $H^N$ -N/ $H^N$ -N,  $H^\alpha$ - $C^\alpha$ / $H^\alpha$ - $C^\alpha$ , intraresidual  $H^N$ -N/ $H^\alpha$ - $C^\alpha$  and sequential  $H^N$ -N/ $H^\alpha$ - $C^\alpha$  CCR rates, respectively. Considering ranges of measured values of 6.73, 43.9, 12.4 and 12.7  $s^{-1}$ , the errors correspond to 2.8, 3.1, 1.6 and 2.1 %.

**Prediction of CCR rates in model-free analysis and structure validation.** The anisotropic diffusion tensor published in Hall and Fushman was used after uniform rescaling to match the effective overall tumbling times of 3.41 ns and 4.03 ns of the deuterated and protonated samples, respectively.<sup>12</sup> The errors are on the order of 1 %. For the prediction of the CCR rates expected for uncorrelated motion of the two vectors the RDC order parameters published in references Yao et al. and Sabo et al.<sup>13,14</sup> The CCR rates predicted for the dynamic model are shown in Tables S5 to S8.

**Errors of the correlation factor  $F_{\text{corr}}$ .** The errors of  $F_{\text{corr}}$  are propagated errors based on the experimental errors of the CCR rates and of the RDC order parameters  $S^{\text{RDC}}$ . If one of the errors of  $S^{\text{RDC}}$  is not available a typical error is assumed. If one of the measuring methods does not yield a value for a CCR rate the errors of the remaining methods are used. If one of the  $S^{\text{RDC}}$  values is not available the average of the preceding and succeeding residues is used (or the average over the whole sequence in the case of  $\text{H}^\alpha\text{-C}^\alpha/\text{H}^\alpha\text{-C}^\alpha$ ). If at least one of these modifications is applied it is indicated in the SI tables. In principle, there is an additional error contribution from the uncertainty in the predicted CCR rate. A reasonable error for the  $\text{H}^{\text{N}}\text{-N}$  and  $\text{H}^\alpha\text{-C}^\alpha$  vector orientations is on the order of  $2^\circ$ . Numerical simulations suggest that this additional error is small in most cases and that the conclusions will be the same.

**Ensemble Structure Calculations.** The ensemble restrained simulation protocol was adapted from that used by Clore and Schwieters, with a few changes.<sup>15</sup> The simulations the Amber 99SB force field as implemented by Case et al. and the final structures were minimized including energy terms for generalized Born implicit solvent as implemented in NIH-Xplor.<sup>16</sup> The backbone and sidechain  $^3\text{J}$  couplings were removed as restraints, as were the B-factor and order

parameter restraints. A relative atomic position (RAP) restraint with a 0.5 Å threshold was applied to the backbone heavy atoms of residues in regular secondary structure elements to ensure the single tensor approximation by maintaining the alignment in the laboratory frame.<sup>17</sup> The rest of the heavy atoms were kept in approximate position using a second loose RAP restraint with a 2.5 Å threshold. The simulations were restrained using flat bottomed potentials with six sets of H<sup>N</sup>-N and H<sup>α</sup>-C<sup>α</sup> RDCs reported by Yao et al.<sup>13</sup> and by the four sets of isotropic CCRs described above. The experimental error for the H<sup>N</sup>-N RDCs was 0.1 Hz and for H<sup>α</sup>-C<sup>α</sup> RDCs 0.2 Hz, experimental errors used to restraint the CCRs are given in tables S1-S4. Ensembles of size 1, 2, 4, 8 and 16 replicas were generated using NIH-XPLOR modified to contain an ensemble averaged isotropic CCR restraint. Control simulations were run with the  $w_{\text{CCR}}$  set to zero. The dihedral correlations were calculated as previously described.

In principle, the CCR rate correction for anisotropic tumbling works best for overall tumbling that is not highly anisotropic and for smaller fluctuations. On the other hand, if the fluctuations are large, many directions are sampled and the relative impact of overall anisotropic tumbling on the CCR rates will become small and the impact of correlated motion on the CCR rates cannot be masked by anisotropic tumbling. In our case, the corrections are relatively small. The largest corrections are ca. 5%, but the majority are much smaller. Even in the extreme case of 5%, the introduced error of  $F_{\text{corr}}$  would be ca. 2-3%.

**Quantification of correlated motion in the work of Clore and Schwieters.**<sup>17</sup> The correlation between two bond vector orientations was quantified by using the correlation function  $C_{kl}$  between residues  $k$  and  $l$  as introduced by Clore and Schwieters.<sup>17</sup> It is essentially a measure of how closely the bond vectors of members of each ensemble line up with those from all other calculated ensembles.  $C_{kl}$  was calculated as follows:  $v_{ikm}$  is the unit vector along a bond vector of

residue  $k$  of member  $m$  (0 or 1) in the ensemble  $i$ . It is assumed that each vector can be binned into one of two orientations. For two residues  $k$  and  $l$  and two ensembles  $i$  and  $j$ , the ensembles are said to coincide if  $f(i,j; k,l) = 1$ , which is the case for either  $v_{ik0} \cdot v_{jk0} > v_{ik0} \cdot v_{jk1}$  and  $v_{il0} \cdot v_{jl0} > v_{il0} \cdot v_{jl1}$ , or for  $v_{ik0} \cdot v_{jk0} < v_{ik0} \cdot v_{jk1}$  and  $v_{il0} \cdot v_{jl0} < v_{il0} \cdot v_{jl1}$ . Otherwise,  $f(i,j; k,l)$  is set to 0. Averaging over all ensembles, the correlation,  $C_{kl}$ , between residues  $k$  and  $l$  is defined as  $C_{kl} = -1 + 2/N^2 \sum_{ij} f(i,j; k,l)$ , where  $i$  and  $j$  are summed over all ensembles and  $N$  is the number of these ensembles.  $C_{kl}$  scales between 0 and 1, which indicate no correlation and perfect correlation, respectively.

**Calculation of sheet bending and twisting.** For each member of each ensemble, the backbone atoms excluding  $C^\alpha$  were fitted to the catenoid shape using the generalized cylinder fitting method using two parameters,<sup>18</sup> the bending parameter and the inclined angle of  $\beta$ -strands that describe the shape of the  $\beta$ -sheet.<sup>19</sup>

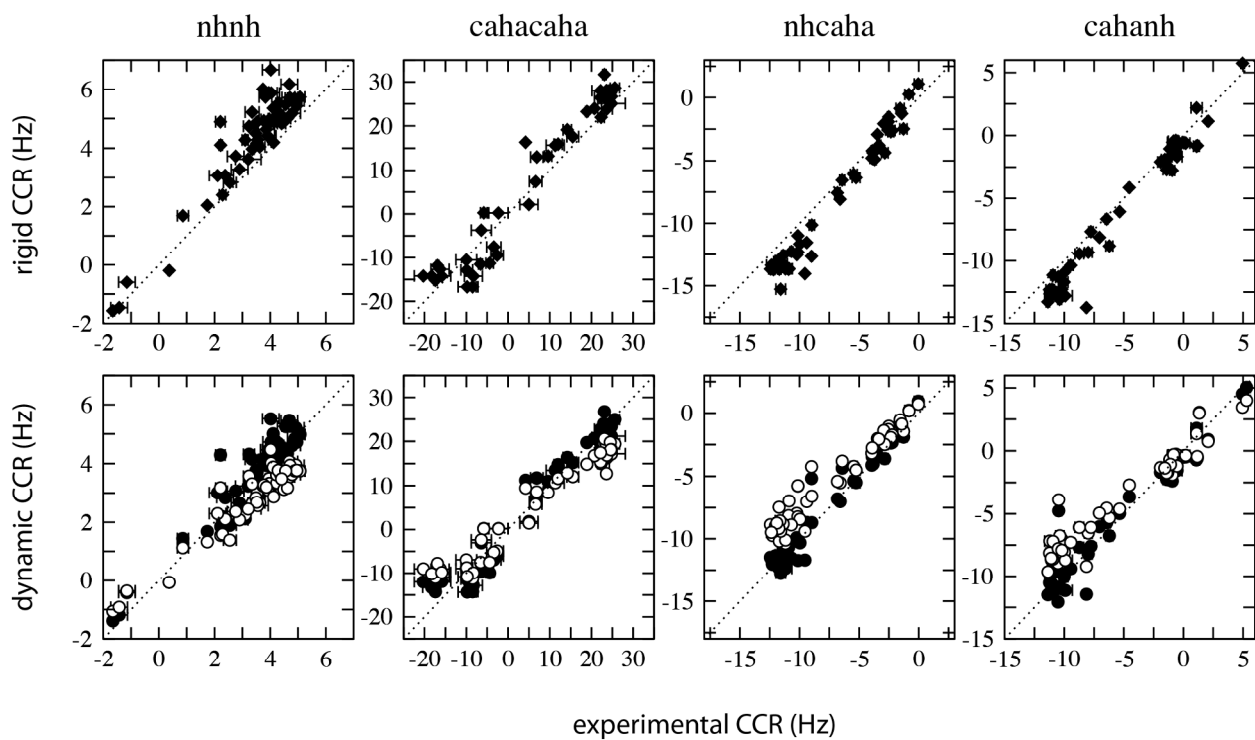

**Figure S1.** Correlation of the calculated and experimental CCR rates. In the top panel, a rigid molecule was assumed, while a dynamic model using the experimental RDC order parameters was applied in the bottom panel. The RDC order parameters were extracted using either the iterative DIDC (filled circles) or ORIUM (empty circles) approaches. Experimental errors on the CCR rates are indicated with error bars.



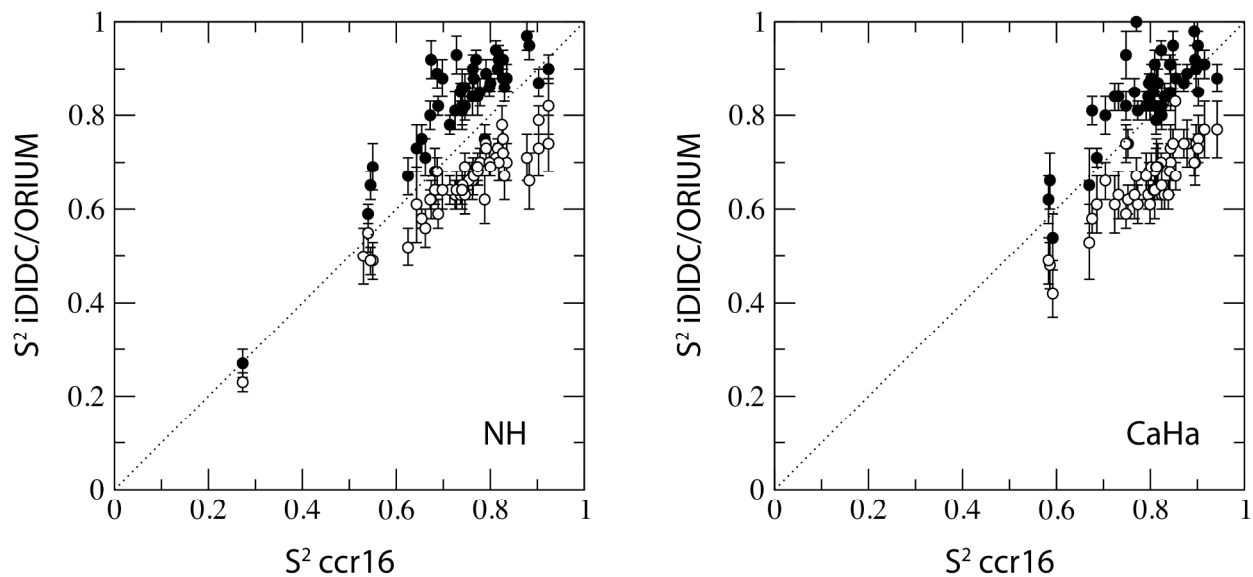

**Figure S2.** Correlation of the  $H^N$ -N and  $H^\alpha$ - $C^\alpha$  order parameters of the calculated ensemble with the ORIUM (open circles) and iDIDC (filled circles) order parameters for a representative ensemble of Ccr16. Note that some values are close to 1 (perfect rigidity), but given the error they are compatible with physically meaningful values.

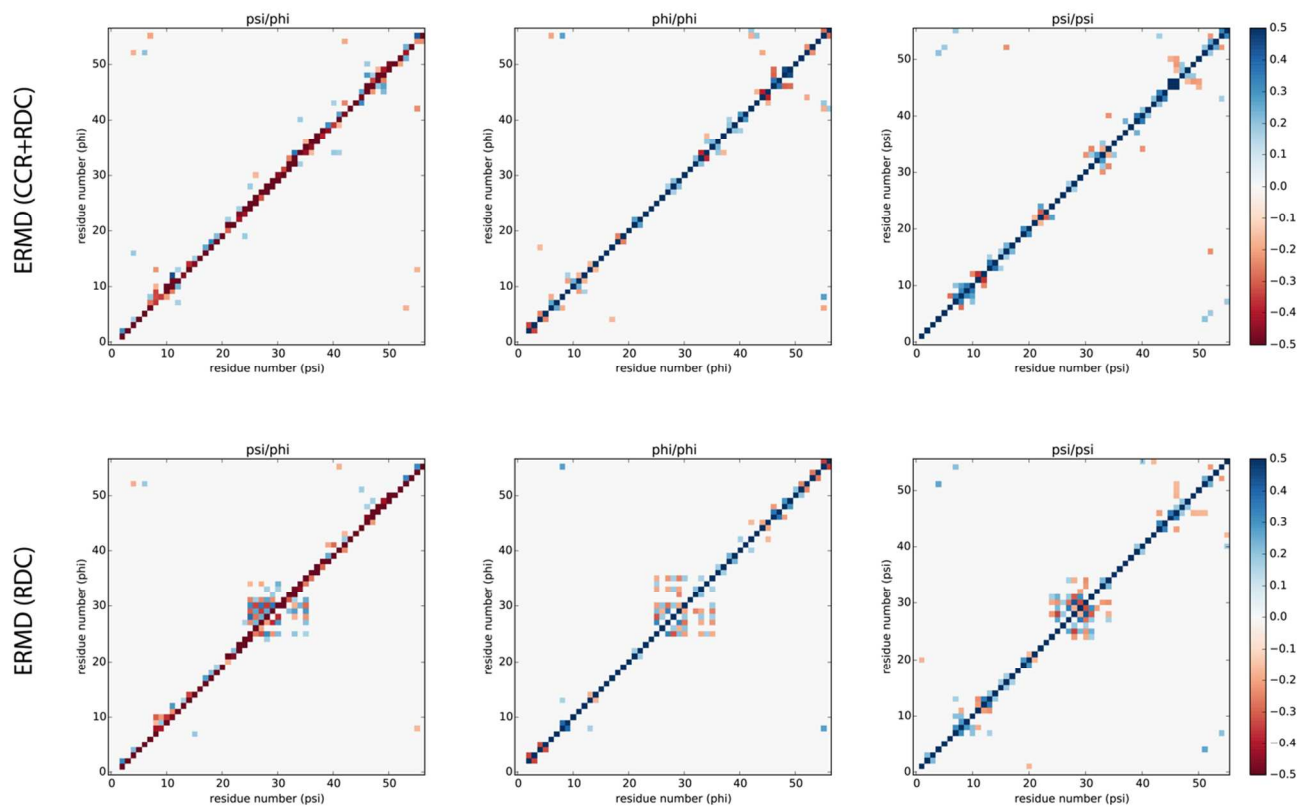

**Figure S3.** Dihedral correlation plots for  $\phi$  and  $\psi$ , calculated for 800 structures from 50 ensembles of 16 members.

**Table S1.** Experimental  $\Gamma = \Gamma_{\text{HNiNi}/\text{HNi}+1\text{Ni}+1} + \Gamma_{\text{HNiNi}+1/\text{HNi}+1\text{Ni}}$  CCR rates obtained from GB3 at T = 298 Kand  $\tau_{c,\text{eff}} = 3.41$  ns.

| res # <sup>a</sup> | aa type | $\Gamma$ (C' + C <sup>Ⓜ</sup> ),<br>corrected<br>[s <sup>-1</sup> ] <sup>bc</sup> | $\Delta\Gamma$ (C' + C <sup>Ⓜ</sup> )<br>[s <sup>-1</sup> ] <sup>d</sup> | $\Delta\Gamma$ (C' + C <sup>Ⓜ</sup> )<br>[s <sup>-1</sup> ] <sup>e</sup> | correction to $\Gamma$<br>[s <sup>-1</sup> ] <sup>c</sup> | isotropic $\Gamma$ | error for<br>isotropic $\Gamma$ |
|--------------------|---------|-----------------------------------------------------------------------------------|--------------------------------------------------------------------------|--------------------------------------------------------------------------|-----------------------------------------------------------|--------------------|---------------------------------|
| 3                  | TYR     | 3.24                                                                              | 0.20                                                                     | 0.05                                                                     | -0.02                                                     | 3.35               | 0.20                            |
| 4                  | LYS+    | 3.53                                                                              | 0.02                                                                     | 0.18                                                                     | -0.02                                                     | 3.56               | 0.02                            |
| 5                  | LEU     | 3.97                                                                              | 0.14                                                                     | 0.10                                                                     | -0.03                                                     | 4.28               | 0.14                            |
| 6                  | VAL     | 3.91                                                                              |                                                                          |                                                                          | -0.02                                                     | 4.22               | 0.30                            |
| 7                  | ILE     | 3.36                                                                              | 0.06                                                                     | 0.11                                                                     | -0.02                                                     | 3.77               | 0.06                            |
| 8                  | ASN     | 0.86                                                                              | 0.20                                                                     | 0.17                                                                     | -0.05                                                     | 1.29               | 0.20                            |
| 9                  | GLY     | -1.15                                                                             |                                                                          |                                                                          | -0.01                                                     | -1.61              | 0.30                            |
| 10                 | LYS+    | 3.10                                                                              | 0.11                                                                     | 0.12                                                                     | -0.16                                                     | 3.33               | 0.11                            |
| 11                 | THR     | 0.37                                                                              | 0.04                                                                     | 0.06                                                                     | -0.38                                                     | 0.53               | 0.04                            |
| 12                 | LEU     | 2.22                                                                              | 0.06                                                                     | 0.04                                                                     | -0.01                                                     | 2.47               | 0.06                            |
| 13                 | LYS+    | 3.83                                                                              | 0.23                                                                     | 0.10                                                                     | -0.03                                                     | 4.09               | 0.23                            |
| 14                 | GLY     | 3.74                                                                              | 0.01                                                                     | 0.20                                                                     | -0.04                                                     | 4.02               | 0.01                            |
| 15                 | GLU     | 3.95                                                                              |                                                                          |                                                                          | -0.03                                                     | 4.17               | 0.30                            |
| 16                 | THR     | 3.35                                                                              | 0.25                                                                     | 0.16                                                                     | -0.03                                                     | 3.52               | 0.25                            |
| 17                 | THR     | 3.97                                                                              |                                                                          |                                                                          | -0.02                                                     | 4.10               | 0.30                            |
| 18                 | THR     | 4.04                                                                              | 0.30                                                                     | 0.18                                                                     | -0.03                                                     | 3.96               | 0.30                            |
| 19                 | LYS+    | 3.62                                                                              | 0.19                                                                     | 0.05                                                                     | -0.01                                                     | 4.11               | 0.19                            |
| 20                 | ALA     | 4.71                                                                              | 0.17                                                                     | 0.13                                                                     | -0.03                                                     | 5.23               | 0.17                            |
| 21                 | VAL     | 1.74                                                                              | 0.03                                                                     | 0.19                                                                     | -0.13                                                     | 2.04               | 0.03                            |
| 22                 | ASP     | 4.69                                                                              |                                                                          |                                                                          | -0.04                                                     | 4.59               | 0.30                            |
| 23                 | ALA     | 3.49                                                                              | 0.08                                                                     | 0.05                                                                     | -0.13                                                     | 3.27               | 0.08                            |
| 24                 | GLU     | 4.24                                                                              |                                                                          |                                                                          | -0.22                                                     | 3.75               | 0.30                            |
| 25                 | THR     | 4.23                                                                              |                                                                          |                                                                          | -0.26                                                     | 4.07               | 0.30                            |
| 26                 | ALA     | 4.92                                                                              |                                                                          |                                                                          | -0.25                                                     | 4.67               | 0.30                            |
| 27                 | GLU     | 4.79                                                                              |                                                                          |                                                                          | -0.16                                                     | 4.35               | 0.30                            |
| 28                 | LYS+    | 4.37                                                                              |                                                                          |                                                                          | -0.22                                                     | 3.94               | 0.30                            |
| 29                 | ALA     | 4.71                                                                              | 0.29                                                                     | 0.12                                                                     | -0.22                                                     | 4.39               | 0.29                            |
| 30                 | PHE     | 4.49                                                                              | 0.03                                                                     | 0.13                                                                     | -0.20                                                     | 4.04               | 0.03                            |
| 31                 | LYS+    | 4.62                                                                              | 0.12                                                                     | 0.05                                                                     | -0.19                                                     | 3.96               | 0.12                            |
| 32                 | GLN     | 4.88                                                                              | 0.26                                                                     | 0.12                                                                     | -0.20                                                     | 4.39               | 0.26                            |
| 33                 | TYR     | 5.07                                                                              | 0.18                                                                     | 0.12                                                                     | -0.19                                                     | 4.61               | 0.18                            |
| 34                 | ALA     | 4.96                                                                              | 0.03                                                                     | 0.06                                                                     | -0.14                                                     | 4.42               | 0.03                            |
| 35                 | ASN     |                                                                                   |                                                                          |                                                                          |                                                           |                    |                                 |
| 36                 | ASP     | 2.90                                                                              |                                                                          |                                                                          | -0.18                                                     | 2.66               | 0.30                            |

|    |      |       |      |      |       |       |      |
|----|------|-------|------|------|-------|-------|------|
| 37 | ASN  | -1.66 | 0.06 | 0.10 | -0.23 | -1.78 | 0.06 |
| 38 | GLY  | 2.38  |      |      | -0.18 | 2.02  | 0.30 |
| 39 | VAL  | 2.76  |      |      | -0.01 | 2.30  | 0.30 |
| 40 | ASP  | 4.02  |      |      | -0.02 | 3.46  | 0.30 |
| 41 | GLY  | 2.21  | 0.17 |      | -0.04 | 2.00  | 0.17 |
| 42 | VAL  | 2.29  | 0.12 | 0.25 | -0.01 | 2.66  | 0.12 |
| 43 | TRP  | 2.11  |      |      | -0.02 | 2.05  | 0.30 |
| 44 | THR  | 4.11  | 0.00 | 0.05 | -0.03 | 4.40  | 0.01 |
| 45 | TYR  | 4.29  | 0.09 | 0.13 | -0.02 | 4.49  | 0.09 |
| 46 | ASP  | 3.55  | 0.38 | 0.07 | -0.03 | 3.79  | 0.38 |
| 47 | ASP  | 2.55  | 0.23 | 0.06 | -0.14 | 2.81  | 0.23 |
| 48 | ALA  | 3.52  | 0.03 | 0.10 | -0.19 | 3.34  | 0.03 |
| 49 | THR  | -1.43 |      |      | -0.30 | -1.28 | 0.30 |
| 50 | LYS+ | 3.77  | 0.22 | 0.05 | -0.20 | 3.88  | 0.22 |
| 51 | THR  | 3.86  |      |      | -0.02 | 3.95  | 0.30 |
| 52 | PHE  | 3.21  | 0.46 | 0.31 | -0.01 | 3.42  | 0.46 |
| 53 | THR  | 4.56  | 0.30 | 0.25 | -0.02 | 4.87  | 0.30 |
| 54 | VAL  | 4.41  | 0.15 | 0.06 | -0.03 | 4.76  | 0.15 |
| 55 | THR  | 3.24  | 0.20 | 0.05 | -0.02 | 3.35  | 0.20 |

<sup>a</sup> Residue number refers to position *i* in the amino acid sequence.

<sup>b</sup> Averaged values from the 3D C'- and C<sup>β</sup>-resolved experiments.

<sup>c</sup> Correction to the apparent CCR rate calculated with the full relaxation-matrix approach (Vögeli 2013).

<sup>d</sup> Random error obtained from half the pairwise r.m.s. deviation between the values from 3D C'- and C<sup>β</sup>-resolved experiments.

<sup>e</sup> Error obtained from the propagated errors of the individual 3D C'- and C<sup>β</sup>-resolved experiments.

**Table S2.** Experimental  $\Gamma = \Gamma_{\text{HAiCAi}/\text{HAi-1CAi-1}} + \Gamma_{\text{HAiCAi-1}/\text{HAi-1CAi}}$  CCR rates<sup>a</sup> obtained from GB3 at T = 298K and  $\tau_{\text{c,eff}} = 4.03$  ns.

| res # <sup>b</sup> | aa type | $\Gamma(2\text{D}+3\text{D})$ [s <sup>-1</sup> ] <sup>c</sup> | $\Delta\Gamma(2\text{D}+3\text{D})$ [s <sup>-1</sup> ] <sup>d</sup> | $\Delta\Gamma(2\text{D}+3\text{D})$ [s <sup>-1</sup> ] <sup>e</sup> | isotropic $\Gamma$ | error for isotropic $\Gamma$ |
|--------------------|---------|---------------------------------------------------------------|---------------------------------------------------------------------|---------------------------------------------------------------------|--------------------|------------------------------|
| 3                  | TYR     | 22.9                                                          | 0.3                                                                 | 0.4                                                                 | 24.85              | 0.30                         |
| 4                  | LYS+    | 15.5                                                          | 1.4                                                                 | 0.7                                                                 | 15.57              | 1.40                         |
| 5                  | LEU     | 22.3                                                          | 0.8                                                                 | 0.2                                                                 | 22.98              | 0.80                         |
| 6                  | VAL     | 23.4                                                          | 0.5                                                                 | 0.6                                                                 | 24.57              | 0.50                         |
| 7                  | ILE     | 24.8                                                          | 3.3                                                                 | 0.4                                                                 | 26.02              | 3.30                         |
| 8                  | ASN     | 22.2                                                          | 2.1                                                                 | 0.8                                                                 | 24.01              | 2.10                         |
| 9                  | GLY     | 1.5                                                           | 1.5                                                                 | 0.1                                                                 |                    |                              |
| 10                 | LYS+    | -0.9                                                          | 3.5                                                                 | 0.5                                                                 |                    |                              |
| 11                 | THR     | 4.2                                                           | 0.0                                                                 | 0.6                                                                 | 4.23               | 0.10                         |
| 12                 | LEU     | -2.6                                                          | 1.5                                                                 | 0.2                                                                 | -2.49              | 1.50                         |
| 13                 | LYS+    | 23.6                                                          | 0.2                                                                 | 0.2                                                                 | 24.91              | 0.20                         |
| 14                 | GLY     | 1.4                                                           | 0.5                                                                 | 0.4                                                                 |                    |                              |
| 15                 | GLU     | 5.2                                                           |                                                                     |                                                                     |                    |                              |
| 16                 | THR     | 24.9                                                          | 0.6                                                                 | 0.7                                                                 | 26.81              | 0.60                         |
| 17                 | THR     | 11.3                                                          |                                                                     |                                                                     | 11.04              | 2.17                         |
| 18                 | THR     | 25.6                                                          | 1.1                                                                 | 0.8                                                                 | 27.02              | 1.10                         |
| 19                 | LYS+    | 6.6                                                           | 1.5                                                                 | 0.9                                                                 | 4.66               | 1.50                         |
| 20                 | ALA     |                                                               |                                                                     |                                                                     |                    |                              |
| 21                 | VAL     |                                                               |                                                                     |                                                                     |                    |                              |
| 22                 | ASP     | 9.6                                                           | 0.9                                                                 | 0.1                                                                 | 10.08              | 0.90                         |
| 23                 | ALA     | -6.6                                                          | 0.5                                                                 |                                                                     | -9.18              | 0.50                         |
| 24                 | GLU     | -8.5                                                          | 1.3                                                                 | 0.2                                                                 | -6.56              | 1.30                         |
| 25                 | THR     | -16.3                                                         |                                                                     |                                                                     | -16.42             | 2.17                         |
| 26                 | ALA     | -10.0                                                         | 2.5                                                                 | 0.4                                                                 | -13.78             | 2.50                         |
| 27                 | GLU     |                                                               |                                                                     |                                                                     |                    |                              |
| 28                 | LYS+    | -20.3                                                         |                                                                     |                                                                     | -19.92             | 4.79                         |
| 29                 | ALA     | -9.9                                                          | 1.4                                                                 | 0.9                                                                 | -10.82             | 1.40                         |
| 30                 | PHE     | -3.4                                                          | 1.7                                                                 | 0.3                                                                 | -7.35              | 1.70                         |
| 31                 | LYS+    | -17.4                                                         | 0.4                                                                 | 0.5                                                                 | -16.72             | 0.40                         |
| 32                 | GLN     | -18.3                                                         |                                                                     |                                                                     | -18.45             | 3.32                         |
| 33                 | TYR     | -16.9                                                         | 0.3                                                                 | 0.6                                                                 | -19.05             | 2.05                         |
| 34                 | ALA     | -4.4                                                          | 0.9                                                                 | 0.7                                                                 | -6.48              | 0.90                         |
| 35                 | ASN     | -8.3                                                          |                                                                     |                                                                     | -7.88              | 2.17                         |
| 36                 | ASP     | -15.9                                                         |                                                                     |                                                                     | -16.35             | 2.17                         |
| 37                 | ASN     | -5.8                                                          | 0.8                                                                 | 0.1                                                                 | -8.35              | 0.80                         |

|    |      |      |     |     |       |      |
|----|------|------|-----|-----|-------|------|
| 38 | GLY  | 1.3  | 1.2 | 0.2 |       |      |
| 39 | VAL  | 2.6  | 0.4 | 0.1 |       |      |
| 40 | ASP  | 23.1 | 0.4 | 1.0 | 19.84 | 0.40 |
| 41 | GLY  | 1.2  | 0.7 | 0.1 |       |      |
| 42 | VAL  | 1.5  | 1.0 | 0.2 |       |      |
| 43 | TRP  | 12.0 | 1.0 | 0.5 | 12.24 | 1.00 |
| 44 | THR  | 24.5 | 0.4 | 0.5 | 26.01 | 0.40 |
| 45 | TYR  | 20.7 | 0.2 | 0.9 | 21.35 | 0.20 |
| 46 | ASP  | 23.7 | 1.3 | 1.4 | 25.07 | 1.30 |
| 47 | ASP  | 6.9  | 1.5 | 0.5 | 6.04  | 1.50 |
| 48 | ALA  | -9.8 |     |     | -7.36 | 2.17 |
| 49 | THR  | 5.0  |     |     | 4.42  | 2.17 |
| 50 | LYS+ | -2.3 | 2.3 | 0.3 | -0.01 | 2.30 |
| 51 | THR  | -6.4 | 2.4 | 0.3 | -9.36 | 2.40 |
| 52 | PHE  | 18.9 | 0.3 |     | 19.70 | 0.30 |
| 53 | THR  | 24.8 | 0.1 | 0.7 | 25.92 | 0.10 |
| 54 | VAL  | 24.6 | 0.3 | 0.3 | 26.03 | 0.30 |
| 55 | THR  | 22.2 | 1.5 | 0.3 | 23.51 | 1.50 |
| 56 | GLU  | 14.2 | 1.0 | 0.2 | 15.16 | 1.00 |

<sup>a</sup> If a glycine residue is involved the CCR rate is the sum of the individual rates corresponding to H<sup>α1</sup> and H<sup>α2</sup>.

<sup>b</sup> Residue number refers to position i in the amino acid sequence.

<sup>c</sup> Averaged values from the 2D and 3D measurements; values from 2D scaled to match 3D.

<sup>d</sup> Random error obtained from half the pairwise r.m.s. deviation between the 2D and 3D measurements; values from 2D scaled to match 3D.

<sup>e</sup> Error obtained from the propagated errors of the individual 2D and 3D measurements.

**Table S3.** Experimental  $\Gamma = \Gamma_{\text{HNI Ni}/\text{HAI CAi}} + \Gamma_{\text{HAI Ni}/\text{HNI CAi}}$  CCR rates<sup>a</sup> obtained from GB3 at T = 298 K and $\tau_{\text{c,eff}} = 4.03$  ns.

| res # <sup>b</sup> | aa type | $\Gamma(\text{ACE+DIAI+MMQ})$ ,<br>corrected<br>[s <sup>-1</sup> ] <sup>c</sup> | $\Delta\Gamma(\text{ACE+DIAI+MMQ})$<br>[s <sup>-1</sup> ] <sup>d</sup> | $\Delta\Gamma(\text{ACE+DIAI+MMQ})$<br>[s <sup>-1</sup> ] <sup>e</sup> | correction<br>to $\Gamma(\text{DIAI})$<br>[s <sup>-1</sup> ] <sup>f</sup> | correction<br>to $\Gamma(\text{ACE})$<br>[s <sup>-1</sup> ] <sup>f</sup> | correction<br>to $\Gamma(\text{MMQ})$<br>[s <sup>-1</sup> ] <sup>f</sup> | isotropic $\Gamma$ | error for<br>isotropic $\Gamma$ |
|--------------------|---------|---------------------------------------------------------------------------------|------------------------------------------------------------------------|------------------------------------------------------------------------|---------------------------------------------------------------------------|--------------------------------------------------------------------------|--------------------------------------------------------------------------|--------------------|---------------------------------|
| 3                  | TYR     | -11.19                                                                          | 0.55                                                                   | 0.09                                                                   | -0.12                                                                     | -0.15                                                                    | 0.03                                                                     | -11.84             | 0.55                            |
| 4                  | LYS+    | -12.19                                                                          | 0.13                                                                   | 0.06                                                                   | -0.19                                                                     | -0.16                                                                    | -0.04                                                                    | -12.68             | 0.13                            |
| 5                  | LEU     | -12.27                                                                          | 0.03                                                                   | 0.26                                                                   | -0.12                                                                     | -0.17                                                                    | 0.00                                                                     | -12.65             | 0.03                            |
| 6                  | VAL     | -11.69                                                                          | 0.14                                                                   | 0.17                                                                   | -0.08                                                                     | -0.17                                                                    | 0.03                                                                     | -12.18             | 0.14                            |
| 7                  | ILE     | -11.36                                                                          |                                                                        | 0.02                                                                   | -0.15                                                                     | -0.15                                                                    | 0.02                                                                     | -12.10             | 0.34                            |
| 8                  | ASN     | -11.72                                                                          | 0.16                                                                   | 0.13                                                                   | -0.17                                                                     | -0.13                                                                    | 0.02                                                                     | -12.23             | 0.16                            |
| 9                  | GLY     |                                                                                 |                                                                        |                                                                        |                                                                           |                                                                          |                                                                          |                    |                                 |
| 10                 | LYS+    | -3.70                                                                           | 0.13                                                                   | 0.13                                                                   | -0.04                                                                     | -0.06                                                                    | -0.02                                                                    | -3.79              | 0.13                            |
| 11                 | THR     | -10.14                                                                          | 0.05                                                                   | 0.09                                                                   | 0.16                                                                      | -0.17                                                                    | 0.12                                                                     | -9.91              | 0.05                            |
| 12                 | LEU     | -8.99                                                                           | 0.08                                                                   | 0.06                                                                   | -0.18                                                                     | -0.13                                                                    | -0.01                                                                    | -9.48              | 0.08                            |
| 13                 | LYS+    | -10.87                                                                          | 0.27                                                                   | 0.01                                                                   | -0.19                                                                     | -0.12                                                                    | -0.05                                                                    | -11.04             | 0.27                            |
| 14                 | GLY     |                                                                                 |                                                                        |                                                                        |                                                                           |                                                                          |                                                                          |                    |                                 |
| 15                 | GLU     | -9.40                                                                           | 0.05                                                                   | 0.60                                                                   | -0.16                                                                     | -0.12                                                                    | -0.02                                                                    | -9.84              | 0.05                            |
| 16                 | THR     | -6.60                                                                           | 0.07                                                                   | 0.08                                                                   | -0.17                                                                     | -0.11                                                                    | -0.01                                                                    | -6.41              | 0.07                            |
| 17                 | THR     | -10.22                                                                          | 0.06                                                                   |                                                                        | -0.26                                                                     | -0.13                                                                    | -0.08                                                                    | -10.53             | 0.06                            |
| 18                 | THR     | -6.82                                                                           | 0.23                                                                   | 0.02                                                                   | -0.09                                                                     | -0.08                                                                    | -0.03                                                                    | -6.35              | 0.23                            |
| 19                 | LYS+    | -11.17                                                                          | 0.11                                                                   | 0.09                                                                   | 0.12                                                                      | -0.21                                                                    | 0.13                                                                     | -11.52             | 0.11                            |
| 20                 | ALA     | -6.42                                                                           | 0.22                                                                   | 0.04                                                                   | -0.11                                                                     | -0.07                                                                    | -0.06                                                                    | -6.98              | 0.22                            |
| 21                 | VAL     | -1.28                                                                           | 0.30                                                                   | 0.11                                                                   | 0.06                                                                      | -0.06                                                                    | -0.02                                                                    | -0.85              | 0.30                            |
| 22                 | ASP     | -5.45                                                                           | 0.29                                                                   | 0.12                                                                   | -0.16                                                                     | -0.06                                                                    | -0.09                                                                    | -5.53              | 0.29                            |
| 23                 | ALA     | -1.57                                                                           | 0.35                                                                   | 0.05                                                                   | -0.03                                                                     | -0.04                                                                    | -0.08                                                                    | -0.52              | 0.35                            |
| 24                 | GLU     | -2.52                                                                           | 0.10                                                                   | 0.04                                                                   | -0.04                                                                     | -0.03                                                                    | -0.09                                                                    | -1.92              | 0.10                            |
| 25                 | THR     | -5.26                                                                           | 0.33                                                                   | 0.21                                                                   | -0.09                                                                     | -0.08                                                                    | -0.02                                                                    | -5.50              | 0.33                            |
| 26                 | ALA     | -2.59                                                                           | 0.19                                                                   | 0.02                                                                   | -0.05                                                                     | -0.06                                                                    | -0.06                                                                    | -2.79              | 0.19                            |
| 27                 | GLU     | -0.04                                                                           |                                                                        | 0.23                                                                   | -0.04                                                                     | -0.04                                                                    | -0.08                                                                    | 0.77               | 0.34                            |
| 28                 | LYS+    | -2.55                                                                           | 0.13                                                                   |                                                                        | -0.03                                                                     | -0.03                                                                    | -0.08                                                                    | -1.99              | 0.13                            |
| 29                 | ALA     | -3.47                                                                           | 0.00                                                                   | 0.02                                                                   | -0.06                                                                     | -0.04                                                                    | -0.09                                                                    | -4.22              | 0.01                            |
| 30                 | PHE     | -3.83                                                                           | 0.18                                                                   | 0.02                                                                   | -0.08                                                                     | -0.05                                                                    | -0.07                                                                    | -3.79              | 0.18                            |
| 31                 | LYS+    | -2.94                                                                           | 0.03                                                                   | 0.03                                                                   | -0.04                                                                     | -0.04                                                                    | -0.08                                                                    | -2.19              | 0.03                            |
| 32                 | GLN     | -3.94                                                                           | 0.15                                                                   | 0.05                                                                   | -0.08                                                                     | -0.05                                                                    | -0.06                                                                    | -3.56              | 0.15                            |
| 33                 | TYR     | -0.83                                                                           |                                                                        | 0.23                                                                   | -0.01                                                                     | -0.01                                                                    | -0.09                                                                    | -1.60              | 0.34                            |
| 34                 | ALA     | -2.23                                                                           | 0.24                                                                   | 0.04                                                                   | -0.05                                                                     | -0.04                                                                    | -0.08                                                                    | -1.35              | 0.24                            |
| 35                 | ASN     | -2.34                                                                           | 0.25                                                                   |                                                                        | -0.04                                                                     | -0.05                                                                    | -0.06                                                                    | -1.88              | 0.25                            |

|    |      |        |      |      |       |       |       |        |      |
|----|------|--------|------|------|-------|-------|-------|--------|------|
| 36 | ASP  | -1.43  | 0.03 |      | -0.04 | -0.03 | -0.09 | -1.65  | 0.03 |
| 37 | ASN  | -10.91 | 0.08 | 0.10 | -0.23 | -0.12 | 0.04  | -10.69 | 0.08 |
| 38 | GLY  |        |      |      |       |       |       |        |      |
| 39 | VAL  | -11.58 | 0.40 | 0.07 | -0.42 | -0.12 | -0.05 | -9.93  | 0.40 |
| 40 | ASP  | -9.55  | 0.01 | 0.05 | -0.33 | -0.11 | -0.03 | -7.74  | 0.01 |
| 41 | GLY  |        |      |      |       |       |       |        |      |
| 42 | VAL  | -10.14 | 0.09 | 0.22 | -0.19 | -0.12 | -0.03 | -10.53 | 0.09 |
| 43 | TRP  | -9.97  | 0.01 | 0.15 | -0.12 | -0.13 | 0.00  | -10.38 | 0.01 |
| 44 | THR  | -10.68 | 0.13 | 0.14 | -0.20 | -0.11 | -0.02 | -10.94 | 0.13 |
| 45 | TYR  | -11.37 | 0.13 | 0.04 | -0.09 | -0.17 | -0.02 | -11.82 | 0.13 |
| 46 | ASP  | -12.19 | 0.00 | 0.16 | -0.24 | -0.13 | -0.01 | -12.65 | 0.01 |
| 47 | ASP  | -2.85  | 0.28 | 0.06 | 0.03  | -0.09 | -0.01 | -1.61  | 0.28 |
| 48 | ALA  | -3.34  | 0.16 | 0.00 | -0.08 | -0.04 | -0.08 | -3.05  | 0.16 |
| 49 | THR  | -11.63 | 0.41 | 0.32 | -0.23 | -0.11 | 0.05  | -11.48 | 0.41 |
| 50 | LYS+ | -3.90  | 0.09 |      | -0.20 | -0.10 | -0.03 | -3.22  | 0.09 |
| 51 | THR  | -12.44 | 0.15 |      | -0.32 | -0.14 | -0.08 | -12.96 | 0.15 |
| 52 | PHE  | -12.02 | 0.03 | 0.15 | -0.03 | -0.18 | 0.03  | -12.51 | 0.03 |
| 53 | THR  | -11.74 | 0.18 | 0.16 | -0.23 | -0.15 | -0.05 | -12.17 | 0.18 |
| 54 | VAL  | -11.91 | 0.27 | 0.20 | -0.14 | -0.15 | -0.03 | -12.31 | 0.27 |
| 55 | THR  | -12.36 | 0.41 |      | -0.11 | -0.17 | 0.03  | -12.86 | 0.41 |
| 56 | GLU  | -8.97  | 0.22 | 0.06 | -0.13 | -0.10 | -0.01 | -9.78  | 0.22 |

<sup>a</sup> If a glycine residue is involved the CCR rate is the sum of the individual rates corresponding to  $H^{\alpha 1}$  and  $H^{\alpha 2}$ .

<sup>b</sup> Residue number refers to position  $i$  in the amino acid sequence.

<sup>c</sup> Averaged values from the DIAI experiment and the average of the ACE and MMQ experiments (relative weights 2:1:1 for DIAI:ACE:MMQ). Corrected by a uniform scaling of 1.014.

<sup>d</sup> Random error obtained from half the pairwise r.m.s. deviation between the DIAI and the average of the ACE and MMQ measurements; values from DIAI and MMQ scaled to match ACE.

<sup>e</sup> Error obtained from the propagated errors of the individual DIAI, ACE and MMQ measurements.

<sup>f</sup> Correction to the apparent CCR rate calculated with the full relaxation-matrix approach (Vögeli 2013).



**Table S4.** Experimental  $\Gamma = \Gamma_{\text{HNiNi}/\text{HAI-1CAi-1}} + \Gamma_{\text{HAI-1Ni}/\text{HNiCAi-1}}$  CCR rates<sup>a</sup> obtained from GB3 at T = 298 K

and  $\tau_{\text{c,eff}} = 4.03$  ns.

| res # <sup>b</sup> | aa type | $\Gamma(\text{ACE+DIAI})$ , corrected [s <sup>-1</sup> ] <sup>c</sup> | $\Delta\Gamma(\text{ACE+DIAI})$ [s <sup>-1</sup> ] <sup>d</sup> | $\Delta\Gamma(\text{ACE+DIAI})$ [s <sup>-1</sup> ] <sup>e</sup> | correction to $\Gamma(1. \text{DIAI})$ [s <sup>-1</sup> ] <sup>f</sup> | correction to $\Gamma(2. \text{DIAI})$ [s <sup>-1</sup> ] <sup>f</sup> | correction to $\Gamma(\text{ACE})$ [s <sup>-1</sup> ] <sup>f</sup> | isotropic $\Gamma$ | error for isotropic $\Gamma$ |
|--------------------|---------|-----------------------------------------------------------------------|-----------------------------------------------------------------|-----------------------------------------------------------------|------------------------------------------------------------------------|------------------------------------------------------------------------|--------------------------------------------------------------------|--------------------|------------------------------|
| 3                  | TYR     | -10.01                                                                | 0.33                                                            | 0.45                                                            | -0.62                                                                  | -0.53                                                                  | -0.24                                                              | -10.77             | 0.33                         |
| 4                  | LYS+    | -7.98                                                                 | 0.33                                                            | 0.19                                                            | -0.50                                                                  | -0.41                                                                  | -0.18                                                              | -7.94              | 0.33                         |
| 5                  | LEU     | -9.99                                                                 | 0.08                                                            | 0.18                                                            | -0.60                                                                  | -0.55                                                                  | -0.22                                                              | -10.04             | 0.08                         |
| 6                  | VAL     | -11.37                                                                | 0.15                                                            | 0.16                                                            | -0.69                                                                  | -0.65                                                                  | -0.27                                                              | -11.86             | 0.15                         |
| 7                  | ILE     | -11.07                                                                | 0.16                                                            | 0.22                                                            | -0.68                                                                  | -0.64                                                                  | -0.23                                                              | -11.80             | 0.16                         |
| 8                  | ASN     | -11.20                                                                | 0.44                                                            | 0.15                                                            | -0.70                                                                  | -0.66                                                                  | -0.22                                                              | -11.96             | 0.44                         |
| 9                  | GLY     | -6.22                                                                 | 0.30                                                            | 0.23                                                            | -0.39                                                                  | -0.32                                                                  | -0.12                                                              | -7.25              | 0.30                         |
| 10                 | LYS+    |                                                                       |                                                                 |                                                                 |                                                                        |                                                                        |                                                                    |                    |                              |
| 11                 | THR     | -0.58                                                                 | 0.29                                                            | 0.17                                                            | -0.05                                                                  | 0.06                                                                   | -0.02                                                              | -0.28              | 0.29                         |
| 12                 | LEU     | 1.32                                                                  | 0.13                                                            | 0.08                                                            | 0.04                                                                   | 0.20                                                                   | 0.01                                                               | 1.15               | 0.13                         |
| 13                 | LYS+    | -10.45                                                                | 0.24                                                            | 0.18                                                            | -0.69                                                                  | -0.62                                                                  | -0.19                                                              | -10.88             | 0.24                         |
| 14                 | GLY     | -10.20                                                                | 0.29                                                            | 0.39                                                            | -0.66                                                                  | -0.63                                                                  | -0.17                                                              | -10.76             | 0.29                         |
| 15                 | GLU     |                                                                       |                                                                 |                                                                 |                                                                        |                                                                        |                                                                    |                    |                              |
| 16                 | THR     | -8.73                                                                 | 0.37                                                            | 0.12                                                            | -0.57                                                                  | -0.48                                                                  | -0.17                                                              | -8.92              | 0.37                         |
| 17                 | THR     | -1.92                                                                 | 0.23                                                            | 0.11                                                            | -0.15                                                                  | 0.16                                                                   | -0.17                                                              | -1.03              | 0.23                         |
| 18                 | THR     | -6.45                                                                 | 0.12                                                            | 0.24                                                            | -0.40                                                                  | -0.32                                                                  | -0.14                                                              | -6.16              | 0.12                         |
| 19                 | LYS+    | -5.35                                                                 | 0.07                                                            | 0.24                                                            | -0.28                                                                  | -0.22                                                                  | -0.15                                                              | -3.57              | 0.07                         |
| 20                 | ALA     | -10.37                                                                | 0.35                                                            | 0.16                                                            | -0.67                                                                  | -0.62                                                                  | -0.20                                                              | -11.30             | 0.35                         |
| 21                 | VAL     | -7.04                                                                 | 0.05                                                            |                                                                 | -0.28                                                                  | -0.30                                                                  | -0.21                                                              | -8.00              | 0.05                         |
| 22                 | ASP     | 2.07                                                                  | 0.09                                                            | 0.20                                                            | 0.10                                                                   | 0.28                                                                   | 0.01                                                               | 2.63               | 0.09                         |
| 23                 | ALA     | -4.54                                                                 | 0.09                                                            | 0.22                                                            | -0.28                                                                  | -0.17                                                                  | -0.12                                                              | -4.26              | 0.09                         |
| 24                 | GLU     | 0.04                                                                  | 0.12                                                            |                                                                 | -0.02                                                                  | 0.12                                                                   | 0.00                                                               | 0.10               | 0.12                         |
| 25                 | THR     | -0.90                                                                 |                                                                 |                                                                 | -0.07                                                                  | 0.04                                                                   | -0.02                                                              | -0.43              | 0.45                         |
| 26                 | ALA     | -0.94                                                                 | 0.21                                                            | 0.25                                                            | -0.07                                                                  | 0.04                                                                   | -0.01                                                              | -0.68              | 0.21                         |
| 27                 | GLU     | -0.68                                                                 |                                                                 |                                                                 | -0.06                                                                  | 0.06                                                                   | -0.02                                                              | -1.67              | 0.45                         |
| 28                 | LYS+    | -0.68                                                                 | 0.13                                                            | 0.14                                                            | -0.06                                                                  | 0.06                                                                   | -0.01                                                              | 0.05               | 0.13                         |
| 29                 | ALA     | -0.64                                                                 | 0.19                                                            | 0.08                                                            | -0.06                                                                  | 0.06                                                                   | -0.01                                                              | -0.29              | 0.19                         |
| 30                 | PHE     | -0.53                                                                 | 0.42                                                            |                                                                 | -0.05                                                                  | 0.07                                                                   | -0.01                                                              | -0.98              | 0.42                         |
| 31                 | LYS+    | -1.31                                                                 | 0.12                                                            | 0.12                                                            | -0.09                                                                  | 0.00                                                                   | -0.02                                                              | -2.19              | 0.12                         |
| 32                 | GLN     | -1.15                                                                 | 0.07                                                            | 0.21                                                            | -0.08                                                                  | 0.02                                                                   | -0.01                                                              | -0.51              | 0.07                         |
| 33                 | TYR     | -1.41                                                                 | 0.31                                                            | 0.12                                                            | -0.10                                                                  | 0.00                                                                   | -0.02                                                              | -1.09              | 0.31                         |
| 34                 | ALA     | -0.82                                                                 | 0.45                                                            | 0.30                                                            | -0.06                                                                  | 0.05                                                                   | -0.01                                                              | -1.75              | 0.45                         |
| 35                 | ASN     | -1.09                                                                 | 0.05                                                            |                                                                 | -0.08                                                                  | 0.02                                                                   | -0.02                                                              | -0.68              | 0.05                         |
| 36                 | ASP     | -1.56                                                                 | 0.30                                                            | 0.29                                                            | -0.10                                                                  | -0.01                                                                  | -0.01                                                              | -1.16              | 0.30                         |

|    |      |        |      |      |       |       |       |        |      |
|----|------|--------|------|------|-------|-------|-------|--------|------|
| 37 | ASN  | 1.09   | 0.24 | 0.13 | 0.03  | 0.19  | 0.00  | 1.70   | 0.24 |
| 38 | GLY  | 4.96   | 0.15 | 0.28 | 0.25  | 0.51  | 0.02  | 5.08   | 0.15 |
| 39 | VAL  |        |      |      |       |       |       |        |      |
| 40 | ASP  | -10.38 | 0.16 | 0.13 | -0.68 | -0.64 | -0.17 | -8.87  | 0.16 |
| 41 | GLY  | -8.14  | 0.07 | 0.11 | -0.55 | -0.50 | -0.11 | -6.63  | 0.07 |
| 42 | VAL  |        |      |      |       |       |       |        |      |
| 43 | TRP  | -9.45  | 0.21 | 0.54 | -0.59 | -0.47 | -0.23 | -10.49 | 0.21 |
| 44 | THR  | -11.23 | 0.31 | 0.27 | -0.72 | -0.69 | -0.20 | -11.73 | 0.31 |
| 45 | TYR  | -7.76  | 0.19 | 0.21 | -0.45 | -0.41 | -0.16 | -8.14  | 0.19 |
| 46 | ASP  | -10.94 | 0.18 | 0.18 | -0.71 | -0.67 | -0.22 | -11.32 | 0.18 |
| 47 | ASP  | -10.51 | 0.15 | 0.17 | -0.53 | -0.55 | -0.27 | -11.12 | 0.15 |
| 48 | ALA  | 1.17   | 0.12 | 0.14 | 0.04  | 0.20  | 0.01  | 1.24   | 0.12 |
| 49 | THR  | 0.20   | 0.35 |      | -0.02 | 0.13  | -0.01 | 0.21   | 0.35 |
| 50 | LYS+ | 5.30   | 0.31 | 0.43 | 0.24  | 0.51  | 0.03  | 5.57   | 0.31 |
| 51 | THR  | 1.10   | 0.47 | 0.21 | 0.03  | 0.23  | -0.02 | 2.80   | 0.47 |
| 52 | PHE  | -9.91  | 0.59 |      | -0.57 | -0.49 | -0.26 | -10.19 | 0.59 |
| 53 | THR  | -10.50 | 0.49 | 0.38 | -0.67 | -0.62 | -0.21 | -10.78 | 0.49 |
| 54 | VAL  | -10.20 | 0.11 | 0.20 | -0.62 | -0.57 | -0.22 | -10.67 | 0.11 |
| 55 | THR  | -10.96 | 0.14 | 0.24 | -0.67 | -0.60 | -0.26 | -11.46 | 0.14 |
| 56 | GLU  | -11.08 | 0.16 | 0.16 | -0.71 | -0.66 | -0.23 | -11.93 | 0.16 |

<sup>a</sup> If a glycine residue is involved the CCR rate is the sum of the individual rates corresponding to H<sup>α1</sup> and H<sup>α2</sup>.

<sup>b</sup> Residue number refers to position i in the amino acid sequence.

<sup>c</sup> Averaged values from the ACE and two DIAI measurements; values from DIAI scaled to match ACE.

<sup>d</sup> Random error obtained from standard deviation of the average of the individual data sets; values from DIAI scaled to match ACE.

<sup>e</sup> Error obtained from the propagated errors of the individual ACE and DIAI measurements.

<sup>f</sup> Correction to the apparent CCR rate calculated with the full relaxation-matrix approach (Vögeli 2013).

**Table S5.** Predicted  $F_{\text{corr}}$  for  $\Gamma = \Gamma_{\text{HNI}i/\text{HNI}+1\text{NI}+1} + \Gamma_{\text{HNI}i+1/\text{HNI}+1\text{NI}}$  for GB3.

| res # <sup>a</sup> | aa type | $\Gamma$<br>(predicted,<br>$S^2$ )<br>[s <sup>-1</sup> ] | $F_{\text{corr}}$ | $\Delta F_{\text{corr}}$ | $\Gamma$ (predicted,<br>$S^2$ )<br>[s <sup>-1</sup> ] | $F_{\text{corr}}$ | $\Delta F_{\text{corr}}$ | $\Gamma$ (predicted,<br>$S^2$ )<br>[s <sup>-1</sup> ] | $F_{\text{corr}}$ | $\Delta F_{\text{corr}}$ |
|--------------------|---------|----------------------------------------------------------|-------------------|--------------------------|-------------------------------------------------------|-------------------|--------------------------|-------------------------------------------------------|-------------------|--------------------------|
|                    |         | <i>iterative DIDC</i>                                    |                   |                          | <i>ORIUM</i>                                          |                   |                          | <i>Current Work</i>                                   |                   |                          |
| 3                  | TYR     | 4.31                                                     | 0.75              | 0.05                     | 3.57                                                  | 0.91              | 0.06                     | 3.432                                                 | 0.97              | 0.01                     |
| 4                  | LYS+    | 3.72                                                     | 0.95              | 0.02                     | 2.99                                                  | 1.18              | 0.04                     | 3.392                                                 | 1.05              | 0.01                     |
| 5                  | LEU     | 4.31                                                     | 0.92              | 0.04                     | 3.49                                                  | 1.14              | 0.07                     | 4.492                                                 | 0.9               | 0.02                     |
| 6                  | VAL     | 3.98                                                     | 0.98              | 0.08                     | 3.11                                                  | 1.26              | 0.12                     | 3.772                                                 | 1.04              | 0.02                     |
| 7                  | ILE     | 3.49                                                     | 0.96              | 0.03                     | 2.66                                                  | 1.26              | 0.06                     | 3.002                                                 | 1.14              | 0.02                     |
| 8                  | ASN     | 1.44                                                     | 0.6               | 0.14                     | 1.12                                                  | 0.77              | 0.18                     | 1.312                                                 | 0.81              | 0.05                     |
| 9                  | GLY     | -0.42                                                    | 2.74              | 0.72                     | -0.36                                                 | 3.2               | 0.85                     | -0.892                                                | 1.47              | 0.32                     |
| 10                 | LYS+    | 2.12*                                                    | 1.46              | 0.11                     | 2.24                                                  | 1.38              | 0.11                     | 2.142                                                 | 1.47              | 0.1                      |
| 11                 | THR     | -0.07*                                                   | -5.64             | 0.78                     | -0.07                                                 | -5.57             | 0.73                     | -0.382                                                | -0.94             | 0.06                     |
| 12                 | LEU     | 1.85                                                     | 1.2               | 0.08                     | 1.55                                                  | 1.43              | 0.09                     | 1.722                                                 | 1.4               | 0.09                     |
| 13                 | LYS+    | 4.06                                                     | 0.94              | 0.07                     | 3.25                                                  | 1.18              | 0.1                      | 3.722                                                 | 1.06              | 0.02                     |
| 14                 | GLY     | 4.14                                                     | 0.9               | 0.04                     | 3.24                                                  | 1.15              | 0.06                     | 3.812                                                 | 1.03              | 0.02                     |
| 15                 | GLU     | 4.46                                                     | 0.89              | 0.07                     | 3.49                                                  | 1.13              | 0.1                      | 3.982                                                 | 1.03              | 0.02                     |
| 16                 | THR     | 4.15                                                     | 0.81              | 0.06                     | 3.31                                                  | 1.01              | 0.08                     | 3.712                                                 | 0.95              | 0.02                     |
| 17                 | THR     | 4.05                                                     | 0.98              | 0.08                     | 3.33                                                  | 1.19              | 0.1                      | 3.472                                                 | 1.16              | 0.02                     |
| 18                 | THR     | 4.73*                                                    | 0.85              | 0.08                     | 4.02*                                                 | 1                 | 0.09                     | 3.922                                                 | 0.98              | 0.04                     |
| 19                 | LYS+    | 2.91*                                                    | 1.24              | 0.1                      | 2.65*                                                 | 1.37              | 0.1                      | 3.152                                                 | 1.22              | 0.04                     |
| 20                 | ALA     | 4.01                                                     | 1.18              | 0.07                     | 3.55                                                  | 1.33              | 0.1                      | 3.732                                                 | 1.3               | 0.02                     |
| 21                 | VAL     | 1.68                                                     | 1.04              | 0.04                     | 1.33                                                  | 1.31              | 0.09                     | 1.652                                                 | 1.13              | 0.04                     |
| 22                 | ASP     | 5.46                                                     | 0.86              | 0.06                     | 4.07                                                  | 1.15              | 0.08                     | 4.292                                                 | 1.07              | 0.02                     |
| 23                 | ALA     | 3.76                                                     | 0.93              | 0.03                     | 2.83                                                  | 1.23              | 0.05                     | 3.022                                                 | 1.1               | 0.03                     |
| 24                 | GLU     | 4.16*                                                    | 1.02              | 0.08                     | 3.34                                                  | 1.27              | 0.1                      | 3.702                                                 | 1.1               | 0.05                     |
| 25                 | THR     | 4.54*                                                    | 0.93              | 0.07                     | 3.62                                                  | 1.17              | 0.09                     | 3.912                                                 | 1.04              | 0.02                     |
| 26                 | ALA     | 5.2                                                      | 0.95              | 0.06                     | 3.95                                                  | 1.25              | 0.09                     | 4.182                                                 | 1.13              | 0.02                     |
| 27                 | GLU     | 4.61                                                     | 1.04              | 0.07                     | 3.63                                                  | 1.32              | 0.1                      | 4.102                                                 | 1.1               | 0.02                     |
| 28                 | LYS+    | 4.58                                                     | 0.96              | 0.07                     | 3.65                                                  | 1.2               | 0.09                     | 4.012                                                 | 1.06              | 0.02                     |
| 29                 | ALA     | 5.26*                                                    | 0.9               | 0.06                     | 3.94                                                  | 1.2               | 0.08                     | 4.182                                                 | 1.08              | 0.02                     |
| 30                 | PHE     | 4.49*                                                    | 1                 | 0.04                     | 3.12                                                  | 1.44              | 0.05                     | 3.542                                                 | 1.2               | 0.03                     |
| 31                 | LYS+    | 4.35                                                     | 1.06              | 0.04                     | 3.18                                                  | 1.45              | 0.06                     | 3.962                                                 | 1.11              | 0.02                     |
| 32                 | GLN     | 4.83                                                     | 1.01              | 0.06                     | 3.75                                                  | 1.3               | 0.07                     | 4.272                                                 | 1.1               | 0.02                     |
| 33                 | TYR     | 4.98                                                     | 1.02              | 0.04                     | 3.75                                                  | 1.35              | 0.07                     | 4.182                                                 | 1.16              | 0.02                     |
| 34                 | ALA     | 4.73                                                     | 1.05              | 0.03                     | 3.76                                                  | 1.32              | 0.05                     | 4.382                                                 | 1.08              | 0.01                     |
| 35                 | ASN     | na                                                       | na                | na                       | na                                                    | na                | na                       | na                                                    | na                | na                       |
| 36                 | ASP     | 2.65                                                     | 1.09              | 0.12                     | 2.08                                                  | 1.4               | 0.15                     | 2.312                                                 | 1.18              | 0.06                     |
| 37                 | ASN     | -1.38                                                    | 1.2               | 0.05                     | -1.06                                                 | 1.56              | 0.07                     | -1.212                                                | 1.38              | 0.09                     |

|    |      |                    |      |      |       |      |      |        |      |      |
|----|------|--------------------|------|------|-------|------|------|--------|------|------|
| 38 | GLY  | 2.84               | 0.84 | 0.11 | 2.1   | 1.13 | 0.15 | 2.262  | 1.02 | 0.1  |
| 39 | VAL  | 3.07 <sup>^</sup>  | 0.9  | 0.1  | 2.36  | 1.17 | 0.13 | 2.452  | 1.13 | 0.26 |
| 40 | ASP  | 5.52 <sup>^^</sup> | 0.73 | 0.07 | 4.47* | 0.9  | 0.08 | 2.6618 | 1.49 | 0.42 |
| 41 | GLY  | 4.29 <sup>^</sup>  | 0.52 | 0.05 | 3.18* | 0.7  | 0.07 | 1.4015 | 1.6  | 0.48 |
| 42 | VAL  | 2.18               | 1.05 | 0.06 | 1.58  | 1.45 | 0.09 | 1.502  | 1.54 | 0.13 |
| 43 | TRP  | 3.01               | 0.7  | 0.1  | 2.29  | 0.92 | 0.14 | 2.042  | 0.99 | 0.02 |
| 44 | THR  | 5.01               | 0.82 | 0.03 | 3.88  | 1.06 | 0.05 | 4.472  | 0.94 | 0.01 |
| 45 | TYR  | 4.68               | 0.92 | 0.03 | 3.77  | 1.14 | 0.05 | 4.242  | 1.02 | 0.02 |
| 46 | ASP  | 3.36               | 1.06 | 0.12 | 2.56  | 1.39 | 0.16 | 2.822  | 1.24 | 0.06 |
| 47 | ASP  | 1.89               | 1.35 | 0.13 | 1.39  | 1.84 | 0.19 | 1.692  | 1.55 | 0.11 |
| 48 | ALA  | 3.51               | 1    | 0.03 | 2.69  | 1.31 | 0.05 | 2.962  | 1.18 | 0.03 |
| 49 | THR  | -1.18              | 1.21 | 0.26 | -0.92 | 1.55 | 0.33 | -1.192 | 1.15 | 0.05 |
| 50 | LYS+ | 4.13               | 0.91 | 0.06 | 3.27  | 1.15 | 0.08 | 3.842  | 1.01 | 0.01 |
| 51 | THR  | 3.94               | 0.98 | 0.08 | 3.2   | 1.21 | 0.1  | 3.522  | 1.08 | 0.01 |
| 52 | PHE  | 3.24               | 0.99 | 0.14 | 2.45  | 1.31 | 0.2  | 2.922  | 1.08 | 0.03 |
| 53 | THR  | 5.26               | 0.87 | 0.06 | 3.75  | 1.22 | 0.11 | 4.712  | 0.98 | 0.01 |
| 54 | VAL  | 4.44               | 0.99 | 0.04 | 3.48  | 1.27 | 0.08 | 4.352  | 1.03 | 0.01 |
| 55 | THR  | 3.67               | 1.12 | 0.03 | 2.87  | 1.44 | 0.07 | 3.372  | 1.25 | 0.02 |

<sup>a</sup> Residue number refers to position *i* in the amino acid sequence

\* Individual  $S^2$  value was missing and has been substituted for the average of neighboring residues

<sup>^</sup> Individual  $S^2$  value was missing and has been substituted for the average for the whole protein.

**Table S6.** Predicted  $F_{\text{corr}}$  for  $\Gamma = \Gamma_{\text{HAiCAi}/\text{HAi+1CAi+1}} + \Gamma_{\text{HAiCAi+1}/\text{HAi+1CAi}}$  for GB3. <sup>a</sup>

| res # <sup>b</sup> | aa type | $\Gamma(\text{predicted}, S^2)$<br>[s <sup>-1</sup> ] | $F_{\text{corr}}$ | $\Delta F_{\text{corr}}$ | $\Gamma(\text{predicted}, S^2)$<br>[s <sup>-1</sup> ] | $F_{\text{corr}}$ | $\Delta F_{\text{corr}}$ | $\Gamma(\text{predicted}, S^2)$<br>[s <sup>-1</sup> ] | $F_{\text{corr}}$ | $\Delta F_{\text{corr}}$ |
|--------------------|---------|-------------------------------------------------------|-------------------|--------------------------|-------------------------------------------------------|-------------------|--------------------------|-------------------------------------------------------|-------------------|--------------------------|
|                    |         | <i>iterative DIDC</i>                                 |                   |                          | <i>ORIUM</i>                                          |                   |                          | <i>Current Work</i>                                   |                   |                          |
| 3                  | TYR     | 15.23                                                 | 1.02              | 0.09                     | 12.03                                                 | 1.29              | 0.13                     | 13.732                                                | 1.1               | 0.03                     |
| 4                  | LYS+    | 19.09                                                 | 1.17              | 0.06                     | 14.99                                                 | 1.49              | 0.08                     | 19.222                                                | 1.14              | 0.01                     |
| 5                  | LEU     | 23.02                                                 | 1.02              | 0.04                     | 19.61                                                 | 1.19              | 0.06                     | 22.872                                                | 1.04              | 0.01                     |
| 6                  | VAL     | 21.16                                                 | 1.17              | 0.16                     | 17.22                                                 | 1.44              | 0.21                     | 19.972                                                | 1.13              | 0.02                     |
| 7                  | ILE     | 20.85                                                 | 1.06              | 0.11                     | 15.4                                                  | 1.44              | 0.17                     | 18.712                                                | 1.22              | 0.02                     |
| 8                  | ASN     | na                                                    | na                | na                       | na                                                    | na                | na                       | na                                                    | na                | na                       |
| 9                  | GLY     | na                                                    | na                | na                       | na                                                    | na                | na                       | na                                                    | na                | na                       |
| 10                 | LYS+    | 11.22*                                                | 0.37              | 0.02                     | 9.45*                                                 | 0.44              | 0.05                     | 3.5418                                                | 1.12              | 0.22                     |
| 11                 | THR     | -6.08*                                                | 0.43              | 0.25                     | -4.91*                                                | 0.53              | 0.31                     | -1.4015                                               | 1.62              | 0.55                     |
| 12                 | LEU     | 16.23                                                 | 1.45              | 0.09                     | 12.72                                                 | 1.85              | 0.15                     | 15.372                                                | 1.54              | 0.02                     |
| 13                 | LYS+    | na                                                    | na                | na                       | na                                                    | na                | na                       | na                                                    | na                | na                       |
| 14                 | GLY     | na                                                    | na                | na                       | na                                                    | na                | na                       | na                                                    | na                | na                       |
| 15                 | GLU     | 24.12                                                 | 1.03              | 0.05                     | 19.55                                                 | 1.27              | 0.06                     | 20.722                                                | 1.23              | 0.01                     |
| 16                 | THR     | 13.49                                                 | 0.84              | 0.16                     | 10.68                                                 | 1.06              | 0.21                     | 11.432                                                | 1.1               | 0.02                     |
| 17                 | THR     | 24.96                                                 | 1.03              | 0.05                     | 19.42                                                 | 1.32              | 0.07                     | 23.522                                                | 1.1               | 0.01                     |
| 18                 | THR     | 6.43*                                                 | 1.03              | 0.25                     | 5.77                                                  | 1.14              | 0.26                     | 5.142                                                 | 1.14              | 0.05                     |
| 19                 | LYS+    | na                                                    | na                | na                       | na                                                    | na                | na                       | na                                                    | na                | na                       |
| 20                 | ALA     | na                                                    | na                | na                       | na                                                    | na                | na                       | na                                                    | na                | na                       |
| 21                 | VAL     | 10.97                                                 | 0.88              | 0.09                     | 8.42                                                  | 1.14              | 0.12                     | 10.352                                                | 0.91              | 0.04                     |
| 22                 | ASP     | -9.73                                                 | 0.68              | 0.06                     | -7.52                                                 | 0.88              | 0.08                     | -8.092                                                | 0.9               | 0.02                     |
| 23                 | ALA     | -14.27                                                | 0.6               | 0.09                     | -11.22                                                | 0.76              | 0.12                     | -12.582                                               | 0.75              | 0.03                     |
| 24                 | GLU     | -10.93*                                               | 1.49              | 0.2                      | -9.02*                                                | 1.81              | 0.26                     | -10.002                                               | 1.17              | 0.03                     |
| 25                 | THR     | -8.93*                                                | 1.12              | 0.28                     | -6.92*                                                | 1.45              | 0.37                     | -9.192                                                | 1.14              | 0.04                     |
| 26                 | ALA     | na                                                    | na                | na                       | na                                                    | na                | na                       | na                                                    | na                | na                       |
| 27                 | GLU     | -12                                                   | 1.69              | 0.18                     | -9                                                    | 2.26              | 0.25                     | -10.792                                               | 1.16              | 0.04                     |
| 28                 | LYS+    | -11.44                                                | 0.87              | 0.12                     | -8.74                                                 | 1.13              | 0.17                     | -10.362                                               | 1.06              | 0.02                     |
| 29                 | ALA     | -6.92*                                                | 0.49              | 0.25                     | -5.23*                                                | 0.65              | 0.33                     | -4.662                                                | 1.08              | 0.1                      |
| 30                 | PHE     | -14.30*                                               | 1.22              | 0.05                     | -11.03*                                               | 1.58              | 0.1                      | -13.532                                               | 1.17              | 0.02                     |
| 31                 | LYS+    | -13.27                                                | 1.38              | 0.17                     | -10.13                                                | 1.81              | 0.22                     | -11.652                                               | 1.14              | 0.02                     |
| 32                 | GLN     | -10.36                                                | 1.63              | 0.04                     | -7.75                                                 | 2.18              | 0.07                     | -9.602                                                | 1.26              | 0.02                     |
| 33                 | TYR     | -9.94                                                 | 0.44              | 0.09                     | -7.51                                                 | 0.59              | 0.12                     | -8.932                                                | 0.63              | 0.03                     |
| 34                 | ALA     | -12.83                                                | 0.65              | 0.17                     | -9.91                                                 | 0.84              | 0.22                     | -11.122                                               | 0.9               | 0.03                     |
| 35                 | ASN     | -11.87                                                | 1.34              | 0.19                     | -9.83                                                 | 1.62              | 0.23                     | -10.552                                               | 1.21              | 0.03                     |
| 36                 | ASP     | 0.2                                                   | -28.43            | 3.97                     | 0.17                                                  | -35.06            | 5.07                     | -1.943                                                | 2.89              | 0.12                     |
| 37                 | ASN     | na                                                    | na                | na                       | na                                                    | na                | na                       | na                                                    | na                | na                       |
| 38                 | GLY     | na                                                    | na                | na                       | na                                                    | na                | na                       | na                                                    | na                | na                       |
| 39                 | VAL     | 26.76^                                                | 0.86              | 0.04                     | 20.58^                                                | 1.12              | 0.08                     | 18.152                                                | 1.28              | 0.31                     |

|    |      |                    |        |       |                    |        |      |         |      |      |
|----|------|--------------------|--------|-------|--------------------|--------|------|---------|------|------|
| 40 | ASP  | na                 | na     | na    | na                 | na     | na   | na      | na   | Na   |
| 41 | GLY  | na                 | na     | na    | na                 | na     | na   | na      | na   | na   |
| 42 | VAL  | 14.77              | 0.81   | 0.07  | 11.68              | 1.03   | 0.1  | 12.352  | 1.08 | 0.02 |
| 43 | TRP  | 23.92              | 1.02   | 0.03  | 19.76              | 1.24   | 0.08 | 23.102  | 1.07 | 0.01 |
| 44 | THR  | 20.67              | 1      | 0.03  | 16.8               | 1.23   | 0.08 | 20.372  | 1.02 | 0.01 |
| 45 | TYR  | 20.59              | 1.15   | 0.07  | 16.87              | 1.41   | 0.1  | 21.862  | 1.06 | 0.01 |
| 46 | ASP  | 11.77              | 0.59   | 0.13  | 8.58               | 0.8    | 0.18 | 8.082   | 1.02 | 0.06 |
| 47 | ASP  | -14.37             | 0.68   | 0.15  | -10.76             | 0.91   | 0.2  | -12.882 | 0.84 | 0.02 |
| 48 | ALA  | 1.79               | 2.79   | 1.21  | 1.42               | 3.53   | 1.54 | 4.492   | 0.9  | 0.09 |
| 49 | THR  | 0.21               | -10.92 | 10.92 | 0.16               | -13.99 | 14   | -1.832  | 1.07 | 0.11 |
| 50 | LYS+ | -3.05              | 2.1    | 0.79  | -2.37              | 2.69   | 1.02 | -3.042  | 1.38 | 0.14 |
| 51 | THR  | 19.76              | 0.96   | 0.03  | 14.87              | 1.27   | 0.05 | 18.572  | 1.02 | 0.01 |
| 52 | PHE  | 23.33              | 1.06   | 0.03  | 18.13              | 1.37   | 0.06 | 22.792  | 1.1  | 0.01 |
| 53 | THR  | 23.64              | 1.04   | 0.03  | 18.12              | 1.36   | 0.07 | 22.052  | 1.13 | 0.01 |
| 54 | VAL  | 22.73              | 0.98   | 0.07  | 17.43              | 1.27   | 0.11 | 21.022  | 1.08 | 0.02 |
| 55 | THR  | 16.34 <sup>^</sup> | 0.87   | 0.07  | 12.90 <sup>^</sup> | 1.1    | 0.12 | 15.692  | 0.95 | 0.05 |

<sup>a</sup> If a glycine residue is involved the CCR rate is the sum of the individual rates corresponding to H<sup>α1</sup> and H<sup>α2</sup>

<sup>b</sup> Residue number refers to position i in the amino acid sequence

\* Individual S<sup>2</sup> value was missing and has been substituted for the average of neighboring residues

<sup>^</sup> Individual S<sup>2</sup> value was missing and has been substituted for the average for the whole protein

**Table S7.** Predicted  $F_{\text{corr}}$  for  $\Gamma = \Gamma_{\text{HNiNi/HAlCAi}} + \Gamma_{\text{HAlNi/HNiCAi}}$  for GB3.<sup>a</sup>

| res # <sup>b</sup> | aa type | $\Gamma$<br>(predicted,<br>$S^2$ )<br>[s <sup>-1</sup> ] | $F_{\text{corr}}$ | $\Delta F_{\text{corr}}$ | $\Gamma$ (predicted<br>d, $S^2$ )<br>[s <sup>-1</sup> ] | $F_{\text{corr}}$ | $\Delta F_{\text{corr}}$ | $\Gamma$ (predicted<br>d, $S^2$ )<br>[s <sup>-1</sup> ] | $F_{\text{corr}}$ | $\Delta F_{\text{corr}}$ |
|--------------------|---------|----------------------------------------------------------|-------------------|--------------------------|---------------------------------------------------------|-------------------|--------------------------|---------------------------------------------------------|-------------------|--------------------------|
|                    |         | <i>iterative DIDC</i>                                    |                   |                          | <i>ORIUM</i>                                            |                   |                          | <i>Current Work</i>                                     |                   |                          |
| 3                  | TYR     | -12.36                                                   | 0.91              | 0.05                     | -10.38                                                  | 1.08              | 0.07                     | -11.382                                                 | 1.02              | 0.01                     |
| 4                  | LYS+    | -11.93                                                   | 1.02              | 0.02                     | -9.3                                                    | 1.31              | 0.04                     | -11.072                                                 | 1.12              | 0.01                     |
| 5                  | LEU     | -12.03                                                   | 1.02              | 0.03                     | -9.73                                                   | 1.26              | 0.05                     | -11.802                                                 | 1.05              | 0.01                     |
| 6                  | VAL     | -11.97                                                   | 0.98              | 0.03                     | -10.2                                                   | 1.15              | 0.06                     | -12.112                                                 | 0.98              | 0.01                     |
| 7                  | ILE     | -11.52                                                   | 0.99              | 0.04                     | -8.61                                                   | 1.32              | 0.08                     | -10.192                                                 | 1.14              | 0.02                     |
| 8                  | ASN     | -9.92                                                    | 1.18              | 0.06                     | -7.47                                                   | 1.57              | 0.1                      | -9.032                                                  | 1.32              | 0.02                     |
| 9                  | GLY     | na                                                       | na                | na                       | na                                                      | na                | na                       | na                                                      | na                | na                       |
| 10                 | LYS+    | -3.16                                                    | 1.17              | 0.05                     | -2.83                                                   | 1.31              | 0.09                     | -5.262                                                  | 0.78              | 0.07                     |
| 11                 | THR     | -5.77**                                                  | 1.76              | 0.15                     | -5.75*                                                  | 1.76              | 0.21                     | -7.562                                                  | 1.32              | 0.08                     |
| 12                 | LEU     | -5.17                                                    | 1.74              | 0.12                     | -4.24                                                   | 2.12              | 0.14                     | -5.072                                                  | 1.85              | 0.03                     |
| 13                 | LYS+    | -8.68                                                    | 1.25              | 0.07                     | -6.96                                                   | 1.56              | 0.12                     | -8.822                                                  | 1.23              | 0.02                     |
| 14                 | GLY     | na                                                       | na                | na                       | na                                                      | na                | na                       | na                                                      | na                | na                       |
| 15                 | GLU     | -8.69                                                    | 1.08              | 0.04                     | -7.01                                                   | 1.34              | 0.06                     | -8.632                                                  | 1.14              | 0.02                     |
| 16                 | THR     | -7.01                                                    | 0.94              | 0.04                     | -5.52                                                   | 1.2               | 0.04                     | -6.042                                                  | 1.12              | 0.02                     |
| 17                 | THR     | -9.89                                                    | 1.03              | 0.02                     | -7.95                                                   | 1.29              | 0.04                     | -9.292                                                  | 1.13              | 0.02                     |
| 18                 | THR     | -6.8                                                     | 1                 | 0.04                     | -5.41                                                   | 1.26              | 0.06                     | -6.102                                                  | 1.1               | 0.02                     |
| 19                 | LYS+    | -10.54**                                                 | 1.06              | 0.1                      | -10.10*                                                 | 1.11              | 0.06                     | -10.172                                                 | 1.09              | 0.04                     |
| 20                 | ALA     | -4.36                                                    | 1.47              | 0.12                     | -3.82                                                   | 1.68              | 0.14                     | -4.932                                                  | 1.34              | 0.04                     |
| 21                 | VAL     | -1.9                                                     | 0.67              | 0.16                     | -1.47                                                   | 0.87              | 0.21                     | -1.502                                                  | 0.73              | 0.09                     |
| 22                 | ASP     | -5.37                                                    | 1.01              | 0.06                     | -4.22                                                   | 1.29              | 0.08                     | -4.932                                                  | 1.14              | 0.03                     |
| 23                 | ALA     | -0.74                                                    | 2.12              | 0.48                     | -0.54                                                   | 2.89              | 0.66                     | -1.252                                                  | 1.09              | 0.24                     |
| 24                 | GLU     | -1.3                                                     | 1.94              | 0.09                     | -1.05                                                   | 2.4               | 0.13                     | -1.942                                                  | 1.25              | 0.09                     |
| 25                 | THR     | -5.51**                                                  | 0.96              | 0.07                     | -4.52*                                                  | 1.16              | 0.09                     | -4.182                                                  | 1.25              | 0.12                     |
| 26                 | ALA     | -2.28                                                    | 1.14              | 0.09                     | -1.72                                                   | 1.51              | 0.12                     | -2.162                                                  | 1.21              | 0.05                     |
| 27                 | GLU     | 0.96                                                     | -0.04             | 0.36                     | 0.71                                                    | -0.06             | 0.48                     | 0.672                                                   | 0.37              | 0.11                     |
| 28                 | LYS+    | -1.66                                                    | 1.54              | 0.08                     | -1.32                                                   | 1.93              | 0.11                     | -2.162                                                  | 1.15              | 0.06                     |
| 29                 | ALA     | -2.68                                                    | 1.3               | 0.02                     | -2.05                                                   | 1.7               | 0.07                     | -2.622                                                  | 1.38              | 0.06                     |
| 30                 | PHE     | -4.04**                                                  | 0.95              | 0.06                     | -2.99*                                                  | 1.28              | 0.1                      | -4.252                                                  | 0.92              | 0.05                     |
| 31                 | LYS+    | -1.93                                                    | 1.52              | 0.04                     | -1.4                                                    | 2.1               | 0.08                     | -2.542                                                  | 1.11              | 0.09                     |
| 32                 | GLN     | -4.13                                                    | 0.95              | 0.04                     | -3.18                                                   | 1.24              | 0.05                     | -4.282                                                  | 0.92              | 0.03                     |
| 33                 | TYR     | 0.22                                                     | -3.82             | 1.56                     | 0.16                                                    | -5.05             | 2.07                     | -0.473                                                  | 1.96              | 0.22                     |
| 34                 | ALA     | -2.32                                                    | 0.96              | 0.11                     | -1.75                                                   | 1.28              | 0.15                     | -1.912                                                  | 1.04              | 0.1                      |
| 35                 | ASN     | -2.37                                                    | 0.99              | 0.11                     | -1.94                                                   | 1.21              | 0.13                     | -2.022                                                  | 1.19              | 0.09                     |
| 36                 | ASP     | -1.06                                                    | 1.35              | 0.04                     | -0.88                                                   | 1.62              | 0.06                     | -1.732                                                  | 0.89              | 0.06                     |
| 37                 | ASN     | -10.67                                                   | 1.02              | 0.03                     | -8.15                                                   | 1.34              | 0.05                     | -9.142                                                  | 1.17              | 0.03                     |

|    |      |          |      |      |        |      |      |         |      |      |
|----|------|----------|------|------|--------|------|------|---------|------|------|
| 38 | GLY  | na       | na   | na   | na     | na   | na   | na      | na   | Na   |
| 39 | VAL  | -12.76   | 0.91 | 0.03 | -9.39  | 1.23 | 0.06 | -11.222 | 1.01 | 0.01 |
| 40 | ASP  | -11.70^^ | 0.82 | 0.04 | -9.40^ | 1.02 | 0.07 | -6.992  | 1.35 | 0.43 |
| 41 | GLY  | na       | na   | na   | na     | na   | na   | na      | na   | na   |
| 42 | VAL  | -11.74   | 0.86 | 0.02 | -8.23  | 1.23 | 0.05 | -9.602  | 1.07 | 0.02 |
| 43 | TRP  | -10.31   | 0.97 | 0.02 | -8.43  | 1.18 | 0.05 | -8.152  | 1.25 | 0.02 |
| 44 | THR  | -11.53   | 0.93 | 0.03 | -8.88  | 1.2  | 0.07 | -10.882 | 0.99 | 0.01 |
| 45 | TYR  | -10.78   | 1.05 | 0.03 | -8.82  | 1.29 | 0.07 | -10.982 | 1.06 | 0.01 |
| 46 | ASP  | -11.71   | 1.04 | 0.03 | -9.44  | 1.29 | 0.04 | -11.162 | 1.11 | 0.01 |
| 47 | ASP  | -3.62    | 0.79 | 0.08 | -2.49  | 1.14 | 0.13 | -2.412  | 1.05 | 0.1  |
| 48 | ALA  | -2.62    | 1.28 | 0.07 | -2.08  | 1.6  | 0.1  | -2.792  | 1.34 | 0.24 |
| 49 | THR  | -11.27   | 1.03 | 0.04 | -8.56  | 1.36 | 0.06 | -10.362 | 1.14 | 0.02 |
| 50 | LYS+ | -3.45    | 1.13 | 0.04 | -2.76  | 1.41 | 0.07 | -2.922  | 1.3  | 0.05 |
| 51 | THR  | -11.48   | 1.08 | 0.03 | -8.87  | 1.4  | 0.06 | -10.232 | 1.24 | 0.01 |
| 52 | PHE  | -11.34   | 1.06 | 0.03 | -8.97  | 1.34 | 0.04 | -11.042 | 1.11 | 0.01 |
| 53 | THR  | -12.36   | 0.95 | 0.03 | -9.17  | 1.28 | 0.08 | -11.042 | 1.08 | 0.01 |
| 54 | VAL  | -11.87   | 1    | 0.03 | -8.74  | 1.36 | 0.08 | -10.832 | 1.11 | 0.01 |
| 55 | THR  | -11.62   | 1.06 | 0.04 | -9.48  | 1.3  | 0.09 | -11.022 | 1.13 | 0.01 |
| 56 | GLU  | -8.70^   | 1.03 | 0.05 | -6.58^ | 1.36 | 0.1  | -8.522  | 1.12 | 0.04 |

<sup>a</sup> If a glycine residue is involved the CCR rate is the sum of the individual rates corresponding to H<sup>α1</sup> and H<sup>α2</sup>

<sup>b</sup> Residue number refers to position i in the amino acid sequence

\* Individual S<sup>2</sup> value was missing and has been substituted for the average of neighbouring residues

^ Individual S<sup>2</sup> value was missing and has been substituted for the average for the whole protein



**Table S8.** Predicted  $F_{\text{corr}}$  for  $\Gamma = \Gamma_{\text{HNiNi/HAi-1CAi-1}} + \Gamma_{\text{HAi-1Ni/HNiCAi-1}}$  for GB3.<sup>a</sup>

| res # <sup>b</sup> | aa type | $\Gamma(\text{predicted}, S^2)$<br>[s <sup>-1</sup> ] | $F_{\text{corr}}$ | $\Delta F_{\text{corr}}$ | $\Gamma(\text{predicted}, S^2)$<br>[s <sup>-1</sup> ] | $F_{\text{corr}}$ | $\Delta F_{\text{corr}}$ | $\Gamma(\text{predicted}, S^2)$<br>[s <sup>-1</sup> ] | $F_{\text{corr}}$ | $\Delta F_{\text{corr}}$ |
|--------------------|---------|-------------------------------------------------------|-------------------|--------------------------|-------------------------------------------------------|-------------------|--------------------------|-------------------------------------------------------|-------------------|--------------------------|
|                    |         | <i>iterative DIDC</i>                                 |                   |                          | <i>ORIUM</i>                                          |                   |                          | <i>Current Work</i>                                   |                   |                          |
| 3                  | TYR     | -10.06 <sup>^</sup>                                   | 1                 | 0.05                     | -8.11 <sup>^</sup>                                    | 1.23              | 0.09                     | -8.502                                                | 1.21              | 0.1                      |
| 4                  | LYS+    | -8.2                                                  | 0.97              | 0.05                     | -6.54                                                 | 1.22              | 0.07                     | -6.992                                                | 1.14              | 0.02                     |
| 5                  | LEU     | -9.84                                                 | 1.01              | 0.03                     | -8.04                                                 | 1.24              | 0.04                     | -8.702                                                | 1.14              | 0.01                     |
| 6                  | VAL     | -11.49                                                | 0.99              | 0.03                     | -9.63                                                 | 1.18              | 0.05                     | -10.832                                               | 1.06              | 0.01                     |
| 7                  | ILE     | -11.05                                                | 1                 | 0.03                     | -8.68                                                 | 1.28              | 0.07                     | -10.342                                               | 1.09              | 0.01                     |
| 8                  | ASN     | -9.76                                                 | 1.15              | 0.07                     | -7.18                                                 | 1.56              | 0.11                     | -8.582                                                | 1.33              | 0.02                     |
| 9                  | GLY     | -6.76 <sup>*</sup>                                    | 0.92              | 0.07                     | -5.31 <sup>*</sup>                                    | 1.17              | 0.14                     | -6.562                                                | 1.02              | 0.02                     |
| 10                 | LYS+    | na                                                    | na                | na                       | na                                                    | na                | na                       | na                                                    | na                | na                       |
| 11                 | THR     | -0.37 <sup>*</sup>                                    | 1.56              | 0.78                     | -0.33 <sup>*</sup>                                    | 1.77              | 0.91                     | -0.5818                                               | 0.64              | 0.4                      |
| 12                 | LEU     | 3.07 <sup>*</sup>                                     | 0.43              | 0.05                     | 3                                                     | 0.44              | 0.06                     | 2.302                                                 | 0.65              | 0.1                      |
| 13                 | LYS+    | -4.76                                                 | 2.19              | 0.17                     | -3.88                                                 | 2.7               | 0.21                     | -4.862                                                | 2.16              | 0.03                     |
| 14                 | GLY     | -8.66 <sup>*</sup>                                    | 1.18              | 0.09                     | -7.05 <sup>*</sup>                                    | 1.45              | 0.14                     | -8.632                                                | 1.21              | 0.02                     |
| 15                 | GLU     | na                                                    | na                | na                       | na                                                    | na                | na                       | na                                                    | na                | na                       |
| 16                 | THR     | -7.68                                                 | 1.14              | 0.07                     | -6.08                                                 | 1.43              | 0.09                     | -7.222                                                | 1.21              | 0.02                     |
| 17                 | THR     | -1.68                                                 | 1.15              | 0.14                     | -1.31                                                 | 1.46              | 0.18                     | -1.592                                                | 1.23              | 0.16                     |
| 18                 | THR     | -5.73                                                 | 1.12              | 0.03                     | -4.55                                                 | 1.42              | 0.05                     | -5.122                                                | 1.23              | 0.02                     |
| 19                 | LYS+    | -4.98 <sup>*</sup>                                    | 1.07              | 0.08                     | -4.63                                                 | 1.16              | 0.05                     | -2.992                                                | 1.39              | 0.14                     |
| 20                 | ALA     | -7.99 <sup>*</sup>                                    | 1.3               | 0.11                     | -6.76 <sup>*</sup>                                    | 1.53              | 0.14                     | -7.772                                                | 1.34              | 0.04                     |
| 21                 | VAL     | -6.03                                                 | 1.17              | 0.05                     | -4.95                                                 | 1.42              | 0.05                     | -6.072                                                | 1.22              | 0.02                     |
| 22                 | ASP     | 0.88                                                  | 2.34              | 0.14                     | 0.73                                                  | 2.83              | 0.24                     | na                                                    | na                | na                       |
| 23                 | ALA     | -3.65                                                 | 1.25              | 0.04                     | -2.69                                                 | 1.69              | 0.09                     | -1.952                                                | 2.33              | 0.25                     |
| 24                 | GLU     | -0.48                                                 | -0.08             | 0.25                     | -0.38                                                 | -0.1              | 0.31                     | -0.4214                                               | -0.49             | 0.14                     |
| 25                 | THR     | -0.44 <sup>*</sup>                                    | 2.03              | 1.02                     | -0.35 <sup>*</sup>                                    | 2.59              | 1.3                      | -1.2219                                               | 0.61              | 0.08                     |
| 26                 | ALA     | -2.38 <sup>*</sup>                                    | 0.39              | 0.09                     | -1.89                                                 | 0.5               | 0.11                     | -2.022                                                | 0.52              | 0.06                     |
| 27                 | GLU     | -0.93                                                 | 0.73              | 0.48                     | -0.69                                                 | 0.99              | 0.66                     | -1.202                                                | 0.81              | 0.09                     |
| 28                 | LYS+    | -1.02                                                 | 0.67              | 0.13                     | -0.79                                                 | 0.86              | 0.17                     | -1.102                                                | 0.42              | 0.05                     |
| 29                 | ALA     | -0.35                                                 | 1.82              | 0.54                     | -0.27                                                 | 2.33              | 0.7                      | -1.172                                                | 0.51              | 0.06                     |
| 30                 | PHE     | -1.55 <sup>*</sup>                                    | 0.34              | 0.27                     | -1.19 <sup>*</sup>                                    | 0.44              | 0.35                     | -0.742                                                | 1.03              | 0.18                     |
| 31                 | LYS+    | -2.26 <sup>*</sup>                                    | 0.58              | 0.06                     | -1.69                                                 | 0.77              | 0.07                     | -0.888                                                | 2.01              | 0.42                     |
| 32                 | GLN     | -0.96                                                 | 1.19              | 0.08                     | -0.68                                                 | 1.68              | 0.12                     | -0.702                                                | 1.53              | 0.18                     |
| 33                 | TYR     | -2.25                                                 | 0.63              | 0.14                     | -1.73                                                 | 0.81              | 0.18                     | -2.742                                                | 0.49              | 0.03                     |
| 34                 | ALA     | -0.41                                                 | 2.01              | 1.1                      | -0.31                                                 | 2.64              | 1.45                     | -0.812                                                | 1.27              | 0.16                     |
| 35                 | ASN     | -1.4                                                  | 0.78              | 0.04                     | -1.07                                                 | 1.02              | 0.06                     | -1.992                                                | 0.47              | 0.02                     |
| 36                 | ASP     | -1.58                                                 | 0.99              | 0.19                     | -1.36                                                 | 1.15              | 0.22                     | -1.972                                                | 0.77              | 0.06                     |
| 37                 | ASN     | -0.7                                                  | -1.55             | 0.34                     | -0.54                                                 | -2.01             | 0.45                     | -1.401                                                | -0.86             | 0                        |
| 38                 | GLY     | 4.53 <sup>*</sup>                                     | 1.09              | 0.05                     | 3.46 <sup>*</sup>                                     | 1.43              | 0.09                     | 4.032                                                 | 1.23              | 0.02                     |

|    |      |                      |       |      |                    |       |      |        |       |      |
|----|------|----------------------|-------|------|--------------------|-------|------|--------|-------|------|
| 39 | VAL  | na                   | na    | na   | na                 | na    | na   | na     | na    | Na   |
| 40 | ASP  | -10.84 <sup>^</sup>  | 0.96  | 0.04 | -8.15 <sup>^</sup> | 1.27  | 0.09 | -7.562 | 1.33  | 0.16 |
| 41 | GLY  | -11.46 <sup>^^</sup> | 0.71  | 0.04 | -9.20 <sup>^</sup> | 0.88  | 0.06 | -8.342 | 0.93  | 0.24 |
| 42 | VAL  | na                   | na    | na   | na                 | na    | na   | na     | na    | na   |
| 43 | TRP  | -9.38                | 1.01  | 0.04 | -7.28              | 1.3   | 0.07 | -8.082 | 1.19  | 0.02 |
| 44 | THR  | -10.52               | 1.07  | 0.04 | -8.13              | 1.38  | 0.08 | -9.502 | 1.19  | 0.01 |
| 45 | TYR  | -7.6                 | 1.02  | 0.04 | -6.09              | 1.27  | 0.07 | -7.982 | 0.99  | 0.02 |
| 46 | ASP  | -9.1                 | 1.2   | 0.05 | -7.2               | 1.52  | 0.06 | -9.092 | 1.2   | 0.02 |
| 47 | ASP  | -12.07               | 0.87  | 0.02 | -8.95              | 1.17  | 0.05 | -9.812 | 1.09  | 0.02 |
| 48 | ALA  | -0.57                | -2.04 | 0.23 | -0.44              | -2.64 | 0.3  | 0.6311 | 2.06  | 0.4  |
| 49 | THR  | -0.47                | -0.43 | 0.75 | -0.35              | -0.57 | 1    | -1.452 | -0.02 | 0.07 |
| 50 | LYS+ | 5.06                 | 1.05  | 0.07 | 4.02               | 1.32  | 0.09 | 4.612  | 1.15  | 0.02 |
| 51 | THR  | 1.78                 | 0.62  | 0.26 | 1.36               | 0.81  | 0.35 | 1.262  | 1.21  | 0.11 |
| 52 | PHE  | -11.14               | 0.89  | 0.06 | -8.71              | 1.14  | 0.08 | -9.872 | 1     | 0.01 |
| 53 | THR  | -9.65                | 1.09  | 0.06 | -7.79              | 1.35  | 0.08 | -8.622 | 1.21  | 0.02 |
| 54 | VAL  | -11.03               | 0.92  | 0.02 | -7.92              | 1.29  | 0.08 | -9.662 | 1.07  | 0.01 |
| 55 | THR  | -11.32               | 0.97  | 0.03 | -8.63              | 1.27  | 0.07 | -9.942 | 1.11  | 0.02 |
| 56 | GLU  | -10.52 <sup>^</sup>  | 1.05  | 0.05 | -8.54 <sup>^</sup> | 1.3   | 0.1  | -8.962 | 1.27  | 0.06 |

<sup>a</sup> If a glycine residue is involved the CCR rate is the sum of the individual rates corresponding to H<sup>α1</sup> and H<sup>α2</sup>

<sup>b</sup> Residue number refers to position i in the amino acid sequence

\* Individual S<sup>2</sup> value was missing and has been substituted for the average of neighboring residues

<sup>^</sup> Individual S<sup>2</sup> value was missing and has been substituted for the average for the whole protein

**Table S9.** R.m.s. deviation, slope  $s$  and Pearson's correlation coefficient  $r$  between experimental and predicted CCR rates obtained from a rigid GB3 model.

| CCR rate                                                                                  | coordinates                                            | r.m.s.d. [ $\text{S}^{-1}$ ] <sup>*</sup> | $s^*$ | $r^*$ |
|-------------------------------------------------------------------------------------------|--------------------------------------------------------|-------------------------------------------|-------|-------|
| $R_{\text{HNiNi}/\text{HNI}+1\text{Ni}+1} + R_{\text{HNiNi}+1/\text{HNI}+1\text{Ni}}$     | 2OED-DIDC <sup>†,‡</sup> , pairs $i = 40, 41$ excluded | 1.51                                      | 0.72  | 0.96  |
|                                                                                           | 2OED-DIDC <sup>#,‡</sup> , pairs $i = 40, 41$ excluded | 0.97                                      | 0.81  | 0.96  |
| $R_{\text{HAiCAi}/\text{HAI}-1\text{CAi}-1} + R_{\text{HAiCAi}-1/\text{HAI}-1\text{CAi}}$ | 2OED-DIDC <sup>†,‡</sup> , pairs $i = 11, 40$ excluded | 6.27                                      | 0.76  | 0.97  |
|                                                                                           | 2OED-DIDC <sup>#,‡</sup> , pairs $i = 11, 40$ excluded | 4.16                                      | 0.88  | 0.97  |
| $R_{\text{HNiNi}/\text{HAiCAi}} + R_{\text{HAINi}/\text{HNiCAi}}$                         | 2OED-DIDC <sup>†,‡</sup>                               | 2.89                                      | 0.75  | 0.98  |
|                                                                                           | 2OED-DIDC <sup>#,‡</sup>                               | 1.57                                      | 0.86  | 0.98  |
| $R_{\text{HNiNi}/\text{HAI}-1\text{CAi}-1} + R_{\text{HAI}-1\text{Ni}/\text{HNiCAi}-1}$   | 2OED-DIDC <sup>†,‡</sup>                               | 2.63                                      | 0.74  | 0.98  |
|                                                                                           | 2OED-DIDC <sup>#,‡</sup>                               | 1.61                                      | 0.85  | 0.98  |

<sup>\*</sup> x axis is the predicted and y axis the experimental rate.

<sup>†</sup>  $r_{\text{HN}} = 1.02 \text{ \AA}$  and  $r_{\text{H}\alpha\text{C}\alpha} = 1.09 \text{ \AA}$  are assumed.

<sup>‡</sup> Coordinates from RDC-refined X-ray structure (14) whose  $\text{H}^{\text{N}}$  and  $\text{H}^{\alpha}$  proton positions were subsequently optimized with RDCs (12, 13).

<sup>#</sup>  $r_{\text{HN}} = 1.041 \text{ \AA}$  and  $r_{\text{H}\alpha\text{C}\alpha} = 1.117 \text{ \AA}$  are assumed.

**Table S10.** Cross validation of ensembles with CCR and  $^3J$  coupling data

|                    | CCR rmsd (Hz) <sup>a</sup>               |                                                                                                                                      |                                                                                    |                                                                                     | $^3J$ coupling rmsd (Hz) <sup>b</sup>           |      |                   |                                                |
|--------------------|------------------------------------------|--------------------------------------------------------------------------------------------------------------------------------------|------------------------------------------------------------------------------------|-------------------------------------------------------------------------------------|-------------------------------------------------|------|-------------------|------------------------------------------------|
|                    | H <sup>N</sup> N/H <sup>N</sup> N        | C <sup><math>\alpha</math></sup> H <sup><math>\alpha</math></sup> /C <sup><math>\alpha</math></sup> H <sup><math>\alpha</math></sup> | H <sup>N</sup> N/C <sup><math>\alpha</math></sup> H <sup><math>\alpha</math></sup> | C <sup><math>\alpha</math></sup> H <sup><math>\alpha</math></sup> /H <sup>N</sup> N | H <sup>N</sup> H <sup><math>\alpha</math></sup> | C'C' | H <sup>N</sup> C' | H <sup>N</sup> C <sup><math>\beta</math></sup> |
| Expt. Err          | 0.19                                     | 1.37                                                                                                                                 | 0.20                                                                               | 0.26                                                                                | 0.14                                            | 0.03 | 0.10              | 0.07                                           |
|                    | Original Ensemble                        |                                                                                                                                      |                                                                                    |                                                                                     |                                                 |      |                   |                                                |
| Ccr16 <sup>c</sup> | 0.15                                     | 2.02                                                                                                                                 | 0.25                                                                               | 0.29                                                                                | 0.55                                            | 0.25 | 0.39              | 0.72                                           |
|                    | Cross Validation (Bold excluded dataset) |                                                                                                                                      |                                                                                    |                                                                                     |                                                 |      |                   |                                                |
| test1 <sup>d</sup> | <b>0.54</b>                              | 2.05                                                                                                                                 | 0.25                                                                               | 0.29                                                                                | 0.54                                            | 0.26 | 0.40              | 0.71                                           |
| test2 <sup>d</sup> | 0.15                                     | <b>3.54</b>                                                                                                                          | 0.26                                                                               | 0.30                                                                                | 0.54                                            | 0.23 | 0.39              | 0.73                                           |
| test3 <sup>d</sup> | 0.15                                     | 2.04                                                                                                                                 | <b>1.07</b>                                                                        | 0.29                                                                                | 0.67                                            | 0.24 | 0.41              | 0.69                                           |
| test4 <sup>d</sup> | 0.15                                     | 1.95                                                                                                                                 | 0.25                                                                               | <b>1.13</b>                                                                         | 0.54                                            | 0.26 | 0.41              | 0.71                                           |

<sup>a</sup> bond lengths of 1.041 and 1.117 Å were used to calculate CCRs from structures to account for libration motions that are not present in static structures

<sup>b</sup> Karplus parameters used were those for the fits to Ace-Ala-NMe <sup>20</sup>, experimental data <sup>21,22</sup>

<sup>c</sup> Average values calculated from 20 ensembles

<sup>d</sup> Average values calculated from 5 ensembles, tests 1-4 are the same calculation as used for ccr16, but with a single CCR dataset omitted in each case

**Table S11.**  $H^N$ -N and  $H^\alpha$ -C $^\alpha$  order parameters S used to calculate  $F_{\text{corr}}$ .

| res # | aa type | $S(H^N-N)^a$ | $\Delta S(H^N-N)^a$ | $S(H^\alpha-C^\alpha)^b$ | $\Delta S(H^\alpha-C^\alpha)^b$ | $S(H^N-N)^c$ | $\Delta S(H^N-N)^c$ | $S(H^\alpha-C^\alpha)^c$ | $\Delta S(H^\alpha-C^\alpha)^c$ |
|-------|---------|--------------|---------------------|--------------------------|---------------------------------|--------------|---------------------|--------------------------|---------------------------------|
| 2     | GLN     |              |                     | 0.95                     | 0.02                            |              |                     | 0.85                     | 0.03                            |
| 3     | TYR     | 0.90         | 0.02                | 0.94                     | 0.02                            | 0.88         | 0.02                | 0.86                     | 0.03                            |
| 4     | LYS+    | 0.94         | 0.02                | 0.91                     | 0.03                            | 0.85         | 0.01                | 0.79                     | 0.02                            |
| 5     | LEU     | 0.93         | 0.03                | 0.95                     | 0.05                            | 0.84         | 0.02                | 0.86                     | 0.02                            |
| 6     | VAL     | 0.93         | 0.03                | 0.92                     | 0.03                            | 0.86         | 0.03                | 0.87                     | 0.03                            |
| 7     | ILE     | 0.92         | 0.03                | 0.92                     | 0.03                            | 0.82         | 0.02                | 0.79                     | 0.03                            |
| 8     | ASN     | 0.93         | 0.03                | 0.81                     | 0.07                            | 0.82         | 0.03                | 0.69                     | 0.04                            |
| 9     | GLY     | 0.91         | 0.04                |                          |                                 | 0.81         | 0.02                |                          |                                 |
| 10    | LYS+    | 0.80         | 0.03                | 0.84                     | 0.02                            | 0.74         | 0.03                | 0.78                     | 0.04                            |
| 11    | THR     | 0.76         |                     |                          |                                 | 0.71         | 0.04                |                          |                                 |
| 12    | LEU     | 0.51         | 0.06                | 0.79                     | 0.07                            | 0.48         | 0.02                | 0.70                     | 0.04                            |
| 13    | LYS+    | 0.83         | 0.03                | 0.73                     | 0.07                            | 0.79         | 0.03                | 0.65                     | 0.04                            |
| 14    | GLY     | 0.84         | 0.05                |                          |                                 | 0.72         | 0.03                |                          |                                 |
| 15    | GLU     | 0.81         | 0.05                | 0.90                     | 0.05                            | 0.75         | 0.03                | 0.81                     | 0.02                            |
| 16    | THR     | 0.89         | 0.04                | 0.96                     | 0.05                            | 0.79         | 0.02                | 0.86                     | 0.02                            |
| 17    | THR     | 0.87         | 0.02                | 0.89                     | 0.03                            | 0.80         | 0.02                | 0.79                     | 0.02                            |
| 18    | THR     | 0.91         | 0.03                | 0.97                     | 0.03                            | 0.84         | 0.02                | 0.85                     | 0.02                            |
| 19    | LYS+    | 0.89         |                     |                          |                                 |              |                     | 0.91                     | 0.03                            |
| 20    | ALA     | 0.83         | 0.06                | 0.81                     | 0.10                            | 0.80         | 0.02                | 0.73                     | 0.05                            |
| 21    | VAL     | 0.91         | 0.06                | 0.90                     | 0.03                            | 0.78         | 0.05                | 0.76                     | 0.02                            |
| 22    | ASP     | 0.88         | 0.02                | 0.92                     | 0.04                            | 0.83         | 0.01                | 0.84                     | 0.02                            |
| 23    | ALA     | 0.91         | 0.02                | 0.91                     | 0.03                            | 0.79         | 0.01                | 0.78                     | 0.04                            |
| 24    | GLU     | 0.87         | 0.03                | 0.93                     | 0.02                            | 0.79         | 0.03                | 0.86                     | 0.02                            |
| 25    | THR     | 0.90         |                     |                          |                                 | 0.86         | 0.01                |                          |                                 |
| 26    | ALA     | 0.92         | 0.02                | 0.91                     | 0.03                            | 0.84         | 0.01                | 0.79                     | 0.02                            |
| 27    | GLU     | 0.94         | 0.03                | 0.90                     | 0.03                            | 0.84         | 0.02                | 0.77                     | 0.02                            |
| 28    | LYS+    | 0.91         | 0.02                | 0.94                     | 0.02                            | 0.84         | 0.02                | 0.82                     | 0.01                            |
| 29    | ALA     | 0.90         | 0.02                | 0.95                     | 0.02                            | 0.85         | 0.01                | 0.82                     | 0.03                            |
| 30    | PHE     | 0.91         |                     |                          |                                 | 0.81         | 0.01                |                          |                                 |
| 31    | LYS+    | 0.95         | 0.04                | 0.97                     | 0.03                            | 0.79         | 0.03                | 0.86                     | 0.02                            |
| 32    | GLN     | 0.89         | 0.02                | 0.95                     | 0.03                            | 0.81         | 0.01                | 0.82                     | 0.01                            |
| 33    | TYR     | 0.91         | 0.02                | 0.91                     | 0.02                            | 0.82         | 0.01                | 0.79                     | 0.02                            |
| 34    | ALA     | 0.91         | 0.04                | 0.96                     | 0.03                            | 0.80         | 0.03                | 0.84                     | 0.03                            |
| 35    | ASN     | 0.87         | 0.03                | 0.94                     | 0.03                            | 0.87         | 0.02                | 0.83                     | 0.02                            |
| 36    | ASP     | 0.89         | 0.02                | 0.89                     | 0.03                            | 0.83         | 0.01                | 0.83                     | 0.02                            |
| 37    | ASN     | 0.88         | 0.03                | 0.90                     | 0.02                            | 0.76         | 0.01                | 0.78                     | 0.03                            |
| 38    | GLY     | 0.94         | 0.04                |                          |                                 | 0.89         | 0.02                |                          |                                 |
| 39    | VAL     | 0.86         | 0.02                | 0.92                     | 0.02                            | 0.77         | 0.02                | 0.80                     | 0.01                            |

|    |      |      |      |      |      |      |      |      |      |
|----|------|------|------|------|------|------|------|------|------|
| 40 | ASP  | 0.90 |      |      |      | 0.82 | 0.02 |      |      |
| 41 | GLY  | 0.77 |      |      |      |      |      |      |      |
| 42 | VAL  | 0.95 | 0.04 | 0.99 | 0.03 | 0.80 | 0.03 | 0.84 | 0.02 |
| 43 | TRP  | 0.93 | 0.03 | 0.94 | 0.03 | 0.82 | 0.02 | 0.88 | 0.03 |
| 44 | THR  | 0.91 | 0.06 | 0.91 | 0.03 | 0.91 | 0.03 | 0.80 | 0.04 |
| 45 | TYR  | 0.92 | 0.04 | 0.96 | 0.03 | 0.80 | 0.03 | 0.88 | 0.03 |
| 46 | ASP  | 0.94 | 0.03 | 0.91 | 0.04 | 0.85 | 0.02 | 0.81 | 0.02 |
| 47 | ASP  | 0.87 | 0.06 | 1.00 | 0.02 | 0.70 | 0.03 | 0.82 | 0.02 |
| 48 | ALA  | 0.83 | 0.04 | 0.86 | 0.03 | 0.70 | 0.02 | 0.79 | 0.02 |
| 49 | THR  | 0.91 | 0.03 | 0.97 | 0.02 | 0.79 | 0.01 | 0.84 | 0.01 |
| 50 | LYS+ | 0.94 | 0.04 | 0.91 | 0.03 | 0.80 | 0.02 | 0.82 | 0.03 |
| 51 | THR  | 0.95 | 0.03 | 0.91 | 0.03 | 0.83 | 0.02 | 0.78 | 0.03 |
| 52 | PHE  | 0.95 | 0.04 | 0.94 | 0.03 | 0.83 | 0.02 | 0.82 | 0.02 |
| 53 | THR  | 0.95 | 0.03 | 0.93 | 0.03 | 0.81 | 0.04 | 0.83 | 0.03 |
| 54 | VAL  | 0.94 | 0.03 | 0.92 | 0.03 | 0.84 | 0.03 | 0.79 | 0.03 |
| 55 | THR  | 0.96 | 0.03 | 0.94 | 0.03 | 0.85 | 0.04 | 0.83 | 0.04 |
| 56 | GLU  | 0.95 | 0.04 |      |      | 0.80 | 0.03 |      |      |

<sup>a</sup> Taken from reference 13. The samples used in that study were deuterated, while the mutants were the same as in the original study with protonated samples. <sup>23</sup>

<sup>b</sup> Taken from reference 23.

<sup>c</sup> Taken from reference 14.

### Cited References

- (1) Pelupessy, P.; Ravindranathan, S.; Bodenhausen, G. *J Biomol NMR* **2003**, *25*, 265.
- (2) Sanders, C. n.; Schwonek, J. *Biochemistry* **1992**, *31*, 8898.
- (3) Chiarparin, E.; Pelupessy, P.; Ghose, R.; Bodenhausen, G. *J Am Chem Soc* **2000**, *122*, 1758.
- (4) Vogeli, B.; Yao, L. *J Am Chem Soc* **2009**, *131*, 3668.
- (5) Pelupessy, P.; Chiarparin, E.; Ghose, R.; Bodenhausen, G. *J Biomol NMR* **1999**, *14*, 277.
- (6) Yang, D.; Kay, L. E. *J Am Chem Soc* **1998**, *120*, 9880.
- (7) Chiarparin, E.; Pelupessy, P.; Ghose, R.; Bodenhausen, G. *J Am Chem Soc* **1999**, *121*, 6876.
- (8) Pelupessy, P.; Chiarparin, E.; Ghose, R.; Bodenhausen, G. *J Biomol NMR* **1999**, *13*, 375.
- (9) Delaglio, F.; Grzesiek, S.; Vuister, G.; Zhu, G.; Pfeifer, J.; Bax, A. *J Biomol NMR* **1995**, *6*, 277.
- (10) Vogeli, B.; Friedmann, M.; Leitz, D.; Sobol, A.; Riek, R. *J Magn Reson* **2010**, *204*, 290.
- (11) Vögeli, B. *J Magn Reson* **2013**, *226*, 52.
- (12) Hall, J.; Fushman, D. *J Biomol NMR* **2003**, *27*, 261.
- (13) Yao, L.; Vogeli, B.; Ying, J.; Bax, A. *J Am Chem Soc* **2008**, *130*, 16518.
- (14) Sabo, T. M.; Smith, C. A.; Ban, D.; Mazur, A.; Lee, D.; Griesinger, C. *J Biomol NMR* **2014**, *58*, 287.
- (15) Clore, G.; Schwieters, C. *J Mol Biol* **2006**, *355*, 879.
- (16) Moulinier, L.; Case, D. A.; Simonson, T. *Acta Crystallogr D* **2003**, *59*, 2094.
- (17) Clore, G.; Schwieters, C. *J Am Chem Soc* **2004**, *126*, 2923.
- (18) Novotny, J.; Brucoleri, R. E.; Newell, J. *J Mol Biol* **1984**, *177*, 567.
- (19) Koh, E.; Kim, T. *Proteins* **2005**, *61*, 559.

- (20) Case, D. A.; Scheurer, C.; Brüsweiler, R. *J Am Chem Soc* **2000**, *122*, 10390.
- (21) Lee, J.; Li, F.; Grishaev, A.; Bax, A. *J Am Chem Soc* **2015**, *137*, 1432.
- (22) Vogeli, B.; Ying, J.; Grishaev, A.; Bax, A. *J Am Chem Soc* **2007**, *129*, 9377.
- (23) Yao, L.; Vogeli, B.; Torchia, D.; Bax, A. *J Phys Chem B* **2008**, *112*, 6045.
